1 **An ortholog of *P. falciparum* chloroquine resistance transporter (PfCRT) plays a key role in**  
2 **maintaining the integrity of the endolysosomal system in *Toxoplasma gondii* to facilitate host**  
3 **invasion**

4 L. Brock Thornton<sup>1</sup>, Paige Teehan<sup>1#a</sup>, Katherine Floyd<sup>1¶</sup>, Christian Cochrane<sup>1¶</sup>, Amy Bergmann<sup>1¶</sup>, Bryce  
5 Riegel<sup>2</sup>, Paul D. Roepe<sup>2</sup> and Zhicheng Dou<sup>1\*</sup>

6

7 1. Dept. of Biological Sciences, Clemson University, Clemson, South Carolina, 29634, United States of  
8 America

9 2. Depts. of Chemistry and of Biochemistry and Cellular and Molecular Biology, Georgetown University,  
10 37<sup>th</sup> and O Streets NW, Washington DC 20057, United States of America

11 <sup>#a</sup>Current Address: Department of Biochemistry and Molecular Biology, The Pennsylvania State University,  
12 Pennsylvania, United States of America

13

14 \*Corresponding author

15 E-mail: [zdou@clemson.edu](mailto:zdou@clemson.edu) (ZD)

16

17 <sup>¶</sup>These authors contributed equally to this work.

18

19 **Short title: Dynamics of the digestive vacuole in *Toxoplasma gondii***

20

21

22 **Abstract**

23 *Toxoplasma gondii* is an apicomplexan parasite with the ability to use foodborne, zoonotic, and congenital  
24 routes of transmission that causes severe disease in immunocompromised patients. The parasites harbor  
25 a lysosome-like digestive vacuole, termed the "Vacuolar Compartment/Plant-Like Vacuole" (VAC/PLV),  
26 which plays an important role in maintaining the lytic cycle and virulence of *T. gondii*. The VAC supplies  
27 proteolytic enzymes that are required to mature the parasite's invasion effectors and that digest  
28 autophagosomes and endocytosed host proteins. Previous work identified a *T. gondii* ortholog of the  
29 *Plasmodium falciparum* chloroquine resistance transporter (PfCRT) that localized to the VAC. Here, we  
30 show that TgCRT is a membrane transporter that is functionally similar to PfCRT. We also genetically  
31 ablate *TgCRT* and reveal that TgCRT protein plays a key role in maintaining the integrity of the parasite's  
32 endolysosomal system by controlling morphology of the VAC. When TgCRT is absent, the VAC  
33 dramatically increases in size by ~15-fold and co-localizes with its adjacent endosome-like compartment.  
34 Presumably to reduce aberrant swelling, transcription and translation of endolysosomal proteases are  
35 decreased in  $\Delta TgCRT$  parasites. Expression of one endolysosomal subtilisin protease is quite significantly  
36 reduced, which impedes trimming of micronemal proteins, and significantly decreases parasite invasion.  
37 Chemical and genetic inhibition of proteolysis within the VAC reverses these effects, reducing VAC size  
38 and partially restoring the endolysosomal system, micronemal protein trimming, and invasion. Taken  
39 together, these findings reveal for the first time a physiological role of TgCRT in controlling VAC volume  
40 and the integrity of the endolysosomal system in *T. gondii*.

41

## 42 **Author Summary**

43 *Toxoplasma gondii* is an obligate intracellular protozoan parasite that belongs to the phylum Apicomplexa  
44 and that infects virtually all warm-blooded organisms. Approximately one-third of the human population is  
45 infected with *Toxoplasma*. The parasites invade host cells via processed invasion effectors in order to  
46 disseminate infection. A lysosome-like digestive vacuole (VAC) is involved in refining these invasion  
47 effectors to reach their final forms. A *T. gondii* ortholog of the malarial chloroquine resistance transporter  
48 protein (TgCRT) was found to be localized to the VAC membrane. Although the mutated version of the  
49 malarial chloroquine resistance transporter (PfCRT) has been shown to confer resistance to chloroquine  
50 treatment, its physiologic function remains poorly understood. Comparison between the related PfCRT and  
51 TgCRT proteins facilitates definition of the physiologic role of CRT proteins. In this study, we report that  
52 TgCRT plays a key role in regulating the integrity and proteolytic activity of the VAC and adjacent  
53 organelles, the secretion of invasion effectors, and parasite invasion and virulence. To relieve osmotic  
54 stress caused by VAC swelling when TgCRT is deleted, parasites repress proteolytic activities within this  
55 organelle to decrease solute accumulation, which then has secondary effects on parasite invasion. Our  
56 findings highlight a common function for PfCRT and TgCRT proteins in regulating apicomplexan parasite  
57 vacuolar size and function.

58

## 59 Introduction

60 *Toxoplasma gondii* uses polypeptide invasion factors to efficiently invade host cells. These proteins  
61 are stored in two unique organelles in *Toxoplasma* parasites, the microneme and rhoptry. The micronemal  
62 proteins undergo a series of proteolytic cleavage steps within the parasite's endosomal system, followed  
63 by further intramembrane cleavage and trimming on the parasite's cell membrane before secretion [1,2].  
64 Proper maturation and secretion of micronemal proteins are crucial for efficient invasion of parasites [3-5].  
65

66 Micronemal protein maturation is regulated by several proteases. During intracellular trafficking, the  
67 micronemal proteins are first cleaved by aspartyl protease 3 (TgASP3) in a post-Golgi compartment [5]. A  
68 cathepsin L-like protease (TgCPL) was also shown to process some micronemal proteins in the endosome-  
69 like compartment (ELC) of the parasite [4]. The mature proteins then pass through the microneme and  
70 undergo further intramembrane cleavage and trimming on the parasite's surface. A plasma membrane-  
71 bound protease, rhomboid 4 (TgROM4), is required to process at least some micronemal proteins and to  
72 release them from the cell surface. TgROM4 substrates include micronemal protein 2 (TgMIC2) and apical  
73 membrane antigen (TgAMA1) [5-8]. Subsequently, a subtilisin ortholog, TgSUB1, was shown to proteolyze  
74 some micronemal proteins into their final forms, including TgMIC2 and TgMIC2-associated protein  
75 (TgM2AP) [3]. Overall, precise control of proteolytic activities within the parasite's endosomal system and  
76 on the plasma membrane is critical for processing parasite invasion effectors.

77  
78 Among these proteases, TgCPL and TgSUB1 are both localized to the parasite's endolysosomal  
79 system. TgCPL is located in an acidic digestive vacuole, termed the Vacuolar Compartment/Plant-like  
80 Vacuole (VAC) in *Toxoplasma* parasites [4,9]. Our previous studies showed that the genetic ablation of  
81 *TgCPL* causes defects in parasite invasion and acute virulence [4,10]. TgCPL becomes activated in the  
82 VAC and a portion of TgCPL is delivered to the juxtaposed ELC for maturation [4]. TgSUB1 is a micronemal  
83 protease and contains a GPI anchor necessary for membrane association [3]. TgSUB1 was shown to be  
84 activated in a post-ER compartment and to enter the parasite's endolysosomal system before trafficking  
85 to the microneme [11]. The deletion of *TgSUB1* led to inefficient trimming of micronemal proteins on the

86 parasite surface, thereby leading to defects in invasion and virulence [3]. Hence, the maintenance of the  
87 integrity of the parasites' endolysosomal system is critical to regulating the distribution and activity of  
88 endolysosomal proteases.

89

90 In addition to VAC dysfunction resulting in reduced invasion, replication, and virulence [4,10], parasites  
91 with impaired VAC function are unable to turn over autophagosomes during chronic infection and thereby  
92 cannot survive in host brain tissue [12]. Despite its importance, the VAC has not been well-characterized.  
93 Only 4 proteins have been localized to the VAC, including TgCPL, TgCPB (a cathepsin B-like protein),  
94 TgCRT (a *Toxoplasma* ortholog of chloroquine resistance transporter), and TgVP1 (a pyrophosphatase)  
95 [4,13-15]. The VAC forms an intact organelle during initial infection and subsequently fragments during  
96 intracellular replication [4]. It is unknown how parasites regulate these and other morphological changes  
97 that occur within the endolysosomal system. In a previous study, *TgCRT* expression was knocked down  
98 in type I *Toxoplasma* parasites using a tetracycline-inducible system [14], and VAC swelling was observed,  
99 suggesting that TgCRT is involved in VAC volume regulation. Fitness defects were also seen in these  
100 parasites suggesting that proper VAC morphology is essential for invasion and / or growth.

101

102 Interestingly, the swollen VAC phenotype for *TgCRT* knockdowns mirrors the enlarged digestive  
103 vacuole (DV) phenotype for chloroquine-resistant (CQR) *Plasmodium falciparum* expressing CQR-  
104 associated mutant PfCRT [16]. More recently, a L272F PfCRT mutation, along with CQR-conferring  
105 mutations, was found to increase DV volume by an additional 1 - 2  $\mu\text{m}^3$  [17]. *In vitro* assays using purified  
106 recombinant PfCRT, reconstituted in proteoliposomes, suggest that PfCRT transports aminoquinoline  
107 drugs, basic amino acids, and perhaps oligopeptides, likely in an electrochemically coupled fashion [18,19].  
108 With respect to drug transport, PfCRT expressed within CQR *P. falciparum* appears to exhibit higher  
109 chloroquine (CQ) transport efficiency relative to PfCRTs found in chloroquine-sensitive (CQS) strains [18-  
110 20]. These findings suggest that the PfCRT regulates the transport of key osmolytes from the *P. falciparum*  
111 DV. Unfortunately, the inability to successfully ablate the *PfCRT* gene [21] limits additional analysis of  
112 function *in vivo*.

113

114 Here, we successfully delete the *TgCRT* gene in a Type I *Toxoplasma* parasite strain by double  
115 crossover homologous recombination. The resulting mutant,  $\Delta crt$ , displayed a severely swollen VAC and  
116 arrested VAC-ELC co-localization. Surprisingly, this aberrant organellar organization reduces transcription  
117 and translation of several proteases residing in the parasite's endolysosomal system, altering microneme  
118 secretion and resulting in defective parasite invasion and acute virulence. We also engineer successful  
119 overexpression of wild type *TgCRT* constructs in yeast and show that the protein mediates CQ transport.  
120 Collectively, these findings determine a novel role for *TgCRT* in regulating VAC volume and maintaining  
121 endolysosomal integrity, suggest functional similarities for *TgCRT* and *PfCRT* proteins, and provide a new  
122 model system for analyzing the function of apicomplexan CRT proteins.

123

## 124 **Results**

### 125 **1. Deletion of *TgCRT* in *Toxoplasma gondii*.**

126 Previous studies have utilized an anhydrotetracycline-regulated system to reduce levels of expression  
127 of *TgCRT* in a Type I *Toxoplasma* RH strain [14]. However, incomplete depletion of *TgCRT* limits further  
128 characterization of its function. Here, we adopted a genetically tractable RH-derived strain, termed  
129  $RH\Delta ku80$  (hereafter referred to as WT), to produce a complete *TgCRT* knockout. The  $RH\Delta ku80$  strain  
130 represses the non-homologous end-joining DNA repair pathway to facilitate homology dependent DNA  
131 recombination [22]. Due to the increased homologous recombination efficiency, this strain has been widely  
132 used as a wild type *Toxoplasma* strain. We PCR amplified ~1.5-kb regions of the 5'- and 3'-untranscribed  
133 regions (UTRs) of *TgCRT*, and flanked both at both 5'- and 3'-ends with a bleomycin (*BLE*) resistance  
134 cassette to assemble a *TgCRT* knockout plasmid. The resulting construct was transfected into WT  
135 parasites to replace the entire *TgCRT* gene with a *BLE* resistance cassette by double crossover  
136 homologous recombination (**Fig 1A**). PCR analysis was performed to test for proper integration and  
137 detected the presence of the *BLE* cassette and the loss of *TgCRT* as shown in the scheme for the  
138 generation of the *TgCRT* knockout in Fig 1A. Amplification of ~1.6 kb fragments at both the 5'- and 3'-end

139 integration regions (5'- and 3'-ARMs) were observed in the *TgCRT* knockout ( $\Delta crt$ ), and a ~1.5 kb *TgCRT*  
140 coding region was also missing within  $\Delta crt$  (**Fig 1B**).

141 To complement loss of *TgCRT*, we modified the pTub-*TgCRT*-mCherry-3xmyc plasmid (a kind gift from  
142 Dr. Giel van Dooren), which over-expresses a mCherry-3xmyc epitope-tagged *TgCRT* under control of the  
143 *Toxoplasma* tubulin promoter. A 1 kb DNA region containing the cognate *TgCRT* promoter was PCR-  
144 amplified and used to replace the tubulin promoter to provide similar transcription of complemented versus  
145 endogenous *TgCRT*. The same primer set used to detect loss of *TgCRT* in the  $\Delta crt$  strain in Fig 1B was  
146 used to confirm integration of exogenously introduced *TgCRT*. Since the complemented *TgCRT* gene lacks  
147 introns, a ~0.2 kb PCR product was observed in the  $\Delta crtCRT$  complementation strain, whereas a ~1.5 kb  
148 fragment was found for the WT strain (**Fig 1C**). To confirm that transcription of *TgCRT* in the  $\Delta crtCRT$   
149 strain was comparable to endogenous levels, SYBR<sup>®</sup> Green-based quantitative PCR (qPCR) was used to  
150 quantify messenger *TgCRT* RNA in WT,  $\Delta crt$ , and  $\Delta crtCRT$  strains. No *TgCRT* transcripts were observed  
151 in  $\Delta crt$ , further validating successful gene disruption. *TgCRT* transcript levels were similar between the WT  
152 and  $\Delta crtCRT$  strains (**Fig 1D**). These data showed successful ablation of the *TgCRT* gene in *Toxoplasma*  
153 parasites, and properly restored expression with exogenously introduced *TgCRT* for the  $\Delta crtCRT$  strain.

154

## 155 **2. *TgCRT*-deficient parasites lose endolysosomal system integrity due to altered VAC morphology.**

156 Upon obtaining RH $\Delta ku80\Delta crt$ , we observed that purified extracellular  $\Delta crt$  parasites exhibited large  
157 concave subcellular structures under differential interference contrast (DIC) microscopy, whereas WT and  
158  $\Delta crtCRT$  strains did not display this phenotype (**Fig 1E**). This subcellular structure was also observed in  
159 pulse invaded  $\Delta crt$  parasites (**Fig 1F**). To identify the swollen structures, we stained the WT,  $\Delta crt$ , and  
160  $\Delta crtCRT$  parasites with anti-TgCPL antibodies. TgCPL is a major luminal endoprotease in the VAC of  
161 *Toxoplasma* [4,23]. Immunofluorescence microscopy showed that TgCPL staining co-localized with  
162 concave subcellular structures in  $\Delta crt$  (**Fig 1F**). The TgCPL staining in  $\Delta crt$  was larger than in WT and  
163  $\Delta crtCRT$  parasites, indicating that the VAC becomes swollen when *TgCRT* is absent. We quantified the  
164 VAC sizes based on TgCPL staining as described previously [12,14]. VAC diameter for the  $\Delta crt$  parasites  
165 ( $1.12 \pm 0.07 \mu\text{m}$ , mean  $\pm$  standard deviation) is approximately 2.6-fold larger than for WT parasites ( $0.43$

166  $\pm 0.03 \mu\text{m}$ ), while for  $\Delta crt CRT$  ( $0.46 \pm 0.02 \mu\text{m}$ ) VAC was similar to that measured for WT parasites (**Fig**  
167 **1F**). If we assume the VAC is approximately spherical, then the  $\Delta crt$  parasite VAC is approximately 15-fold  
168 larger than the WT VAC (**Fig 1F**). In contrast to pulse invaded parasites, the swollen concave structure  
169 was not observed in replicated  $\Delta crt$  parasites (**Fig 1G**). However, TgCPL staining showed differences  
170 between WT and  $\Delta crt$  parasites (**Fig 1G**). For WT, VAC fragments that appear during replication appear  
171 as fragmented puncta upon TgCPL staining [4]. However, TgCPL staining revealed a single punctate  
172 structure in replicating  $\Delta crt$  parasites (**Fig 1G**). Overall, we find that loss of TgCRT severely alters the  
173 morphology of the VAC in growing as well as replicating *Toxoplasma*.

174

175 The VAC is a lysosome-like organelle, participating in the parasite's endolysosomal system. It provides  
176 an environment for maturation of TgCPL and delivers activated TgCPL to its adjacent endosome-like  
177 compartment (ELC) to assist in processing micronemal proteins required for parasite invasion [4]. It also  
178 serves as a digestive vacuole to digest endocytosed proteins [4,10,24]. We hypothesized that the dramatic  
179 swelling of the VAC might affect the integrity of the parasite's endolysosomal system. We stained WT,  $\Delta crt$ ,  
180 and  $\Delta crt CRT$  parasites with antibodies recognizing markers of the VAC (anti-TgCPL) and of the ELC (anti-  
181 proTgM2AP or TgVP1) [4]. In pulse invaded parasites, the VAC and ELC displayed distinct subcellular  
182 staining in WT and  $\Delta crt CRT$  strains, whereas in  $\Delta crt$  parasites both markers partially co-localized (**Fig 1G**).  
183 Similarly, the single TgCPL punctum in replicating  $\Delta crt$  parasites also showed partial co-localization with  
184 both proTgM2AP and TgVP1 (**Fig 1G**). These findings suggest that TgCRT mediated VAC morphology  
185 affects the integrity of the parasite's endolysosomal system.

186

### 187 **3. RH $\Delta ku80 \Delta crt$ shows reduced invasion and acute virulence.**

188 *Toxoplasma* utilizes exocytosis and endocytosis via the endolysosomes to release micronemal  
189 invasion effectors, and to ingest host proteins required for intracellular growth, respectively [10,25-27]. We  
190 therefore characterized invasion, replication, and egress for the RH $\Delta ku80 \Delta crt$  strain. First, we measured  
191 the invasion efficiency of parasites at 30-120 min post-infection. At 30 min post-infection, the  $\Delta crt$  mutant  
192 showed ~50% reduction in invasion compared to WT and  $\Delta crt CRT$  (**Fig 2A**). The differences in invasion



193 efficiency between WT and  $\Delta crt$  were reduced to ~20% at 60 min post-infection, and were not seen at 120  
194 min post-infection (**Fig 2A**), suggesting that  $\Delta crt$  parasites have slower invasion kinetics relative to the WT  
195 strain. Second, we used immunofluorescence microscopy to quantify parasite replication. Infected cells  
196 were stained with DAPI and anti-TgGRA7 antibody to define individual parasite nuclei and parasitophorous  
197 vacuolar (PV) membranes, respectively. The average number of parasites per PV was calculated for each  
198 strain in order to compare replication rates. There were no statistical differences in parasite replication  
199 between WT and  $\Delta crt$  parasites at 28 and 40 hrs post-infection (**Fig 2B**). We also introduced NanoLuc<sup>®</sup>  
200 luciferase into WT,  $\Delta crt$ , and  $\Delta crtCRT$  parasites, and measured the fold-change in luciferase activity for 72  
201 hrs post-infection in order to calculate relative growth rates. Similarly, we did not observe growth  
202 differences between WT and  $\Delta crt$  at 24, 48, and 72 hrs post-infection (**Fig 2B**). Third, the egress efficiency  
203 of each strain was determined by a lactate dehydrogenase release-based assay. The parasites were  
204 incubated with 0.5 mM Zaprinast for 5 min to induce egress. The egressed parasites disrupt host cell  
205 membranes to release lactate dehydrogenase that is subsequently quantified to extrapolate to the number  
206 of egressed PVs. We did not observe egress defects in the *TgCRT*-deficient parasites (**Fig 2C**). Last, we  
207 determined the acute virulence of  $\Delta crt$  parasites in a murine model. Outbred CD-1 mice were infected with  
208 a subcutaneous or intravenous inoculum of 100 WT,  $\Delta crt$ , or  $\Delta crtCRT$  parasites. Thirty percent of mice  
209 infected with the  $\Delta crt$  mutant survived when mice were infected by subcutaneous injection, while the WT  
210 and  $\Delta crtCRT$  infections led to mortality at 10-12 days post-infection (**Fig 2D**). Mice receiving WT parasites  
211 by intravenous inoculation showed mortality starting at 13 days post-infection and all were expired at 20  
212 days. The  $\Delta crt$  and  $\Delta crtCRT$  parasites caused death in 40% and 80% of infected mice respectively (**Fig**  
213 **2D**). Statistical analysis showed that mice infected with WT and  $\Delta crt$  parasites have significantly different  
214 survival. Seroconversion of the surviving mice was confirmed by ELISA (not shown). We also challenged  
215 surviving  $\Delta crt$  mice with 1000 WT parasites by subcutaneous injection, and did not observe lethality after  
216 30 days post-challenge. These findings indicate that the pre-inoculation of  $\Delta crt$  parasites conferred  
217 immunological protection to subsequent acute toxoplasmosis. Collectively, our findings revealed that  
218 *Toxoplasma* parasites require the TgCRT protein for optimal invasion and acute virulence but not for  
219 replication and egress.

220

#### 221 **4. RH $\Delta$ ku80 $\Delta$ crt shows impaired microneme secretion.**

222 During infection, *Toxoplasma* parasites sequentially secrete proteins to facilitate host invasion.  
223 Micronemal proteins are the first to be secreted. These traffic through the parasite's endolysosomal system  
224 and undergo intracellular maturation, intramembrane cleavage, and cell surface trimming before secretion  
225 [3-8,28]. To test which step(s) was (were) affected in the  $\Delta$ crt parasites, we probed cell lysates and  
226 excretory secretory antigen (ESAs) fractions of each strain with anti-TgMIC2, anti-TgM2AP, and anti-  
227 TgMIC5 (antibodies to three representative micronemal proteins) by immunoblotting to measure  
228 abundances and secretion patterns. The migration patterns of these three micronemal proteins in cell  
229 lysates were very similar among the strains. The abundances of the individual micronemal proteins were  
230 normalized against the protein level of *Toxoplasma* actin protein by densitometry and plotted for  
231 quantification. All three strains showed comparable steady state abundances of these proteins (**Fig 3A**).  
232 To further evaluate abundances, we probed constitutive and induced ESAs with the same antibodies. The  
233 constitutive and induced ESAs were generated by incubating purified parasites in D10 medium (DMEM  
234 medium supplemented with 10% (v/v) cosmic calf serum) for 30 min at 37°C or D10 medium supplemented  
235 with 1% (v/v) ethanol for 2 min at 37°C, respectively. In the ESAs secreted by WT parasites, TgMIC2  
236 exhibited two bands migrating at 100 kDa and 95 kDa, while TgM2AP showed 4 proteolytically processed  
237 polypeptides along with pro- and mature forms. However, TgMIC2 only existed as a 100 kDa band in  $\Delta$ crt  
238 parasites. Furthermore, mature TgM2AP was not processed in the constitutive ESAs of the  $\Delta$ crt strain and  
239 showed significantly reduced processing in the induced ESAs of  $\Delta$ crt parasites (**Fig 3B**). The secreted  
240 TgMIC5 protein displayed similar migration patterns among these strains (**Fig 3B**). Secretion of these  
241 micronemal proteins was also quantified by normalizing the relative abundances of the proteins against  
242 the protein level of secreted TgGRA7, a dense granule protein. The secretion of TgMIC2, TgM2AP, and  
243 TgMIC5 were reduced by ~80%, 35%, and 40%, respectively, in the induced ESAs of  $\Delta$ crt parasites,  
244 compared to the WT strain. The differences in the amount of microneme secretion were less significant in  
245 the constitutive ESAs. Only TgMIC2 secretion was decreased by ~55% in  $\Delta$ crt parasites compared to the  
246 WT strain, while TgM2AP and TgMIC5 did not show differences (**Fig 3B**). To examine whether the

247 abnormal secretion of micronemal proteins alters their intracellular trafficking patterns, we stained pulse  
248 invaded and replicated parasites with TgMIC2 and TgM2AP antibodies. Both microneme proteins trafficked  
249 to the apical end of the parasites and showed normal staining patterns (**Fig 3C**).

250

251 Prior to secretion, some membrane-anchored micronemal proteins are released via proteolytic  
252 cleavage by intramembrane rhomboid proteases such as TgROM4. The deletion of TgROM4 leads to  
253 retention of some micronemal proteins on the parasite's plasma membrane, such as TgMIC2 and TgAMA1  
254 (*Toxoplasma* apical membrane antigen 1) [6-8,28]. To test whether the aberrant endolysosomal system  
255 alters the retention of micronemal proteins on the surface of parasites, we stained the purified, non-  
256 permeabilized extracellular parasites with anti-TgMIC2 antibody. Immunofluorescence microscopy did not  
257 reveal excess TgMIC2 on the plasma membrane of  $\Delta crt$  parasites (**Fig S1**), suggesting that the reduced  
258 secretion of micronemal proteins is not due to inefficient intramembrane cleavage of micronemal proteins  
259 on the parasite's plasma membrane.

260

261 The endosome-like compartment is involved not only in the trafficking of micronemal proteins, but also  
262 rhoptry contents [29]. We stained newly invaded and replicated parasites with anti-TgROP7 antibodies to  
263 examine the trafficking of rhoptry proteins and the morphology of the rhoptry. The TgROP7 staining  
264 revealed typical rhoptry patterns located at the apical end of the parasites (**Fig 3D**), excluding the possibility  
265 of aberrant trafficking of rhoptry contents and possible defects in biogenesis. Taken together, our data  
266 suggest that invasion defects for  $\Delta crt$  parasites are caused by incomplete trimming and consequent  
267 inefficient secretion of micronemal proteins, but not by altered intracellular maturation, trafficking, or  
268 intramembrane cleavage of micronemal proteins, nor by altered rhoptry morphology.

269

## 270 **5. TgSUB1 transcript and protein levels are decreased for $\Delta crt$ parasites.**

271 The inefficient proteolytic processing of TgMIC2 and TgM2AP in RH $\Delta ku80\Delta crt$  ESAs led us to  
272 investigate the abundance of *Toxoplasma* subtilisin 1 (TgSUB1) in the  $\Delta crt$  parasites. A previous  
273 publication reported that parasites lacking TgSUB1 showed defective trimming patterns for secreted

274 micronemal proteins, such as TgMIC2 and TgM2AP [3], which seemed, to us, to be similar to the secretion  
275 patterns observed for the  $\Delta crt$  mutant. Therefore, we quantified secreted TgSUB1 in both constitutive and  
276 induced ESAs by probing them with an anti-SUB1 antibody, previously found to specifically react against  
277 TgSUB1 and PfSUB1 [30]. Immunoblotting analysis revealed that there was no detectable TgSUB1 in the  
278 ESAs of  $\Delta crt$  parasites (**Fig 4A**). Non-permeabilized extracellular parasites were also stained with anti-  
279 SUB1 to evaluate the amount of surface-anchored TgSUB1. Similarly, there was no detectable TgSUB1  
280 staining on the plasma membrane of  $\Delta crt$  parasites (**Fig 4B**). These data suggest that TgSUB1 is not  
281 efficiently delivered to the surface of parasites in the  $\Delta crt$  mutant.

282

283 TgSUB1 is a micronemal protein that also traffics through the parasite's endolysosomal system [3,11].  
284 The aberrant endolysosomal system in  $\Delta crt$  parasites potentially alters intracellular trafficking and/or  
285 maturation of TgSUB1 that then reduces expression. To test these possibilities, first, we stained pulse  
286 invaded and replicated parasites with anti-SUB1 to examine TgSUB1 intracellular trafficking patterns.  
287 TgMIC5 localization was used as a reference for typical expected microneme staining. Surprisingly, we  
288 observed much less TgSUB1 staining in  $\Delta crt$  parasites compared to the WT strain (**Fig 4C**). Next, we  
289 quantified abundance of TgSUB1 in parasite cell lysates and found that TgSUB1 was decreased by  
290 approximately 90% in  $\Delta crt$  parasites compared to WT parasites (**Fig 4D**). To further understand how  
291 TgSUB1 expression is suppressed in the  $\Delta crt$  mutant, we performed qPCR to measure *TgSUB1* mRNA  
292 for WT,  $\Delta crt$ , and  $\Delta crtCRT$  parasites. *TgSUB1* transcript was reduced ~10-fold upon deletion of *TgCRT*  
293 (**Fig 4E**). Collectively, our findings suggest that arrested co-localization of the VAC and ELC dramatically  
294 decreases the abundance of TgSUB1 protein, which then alters the proteolytic processing of normally  
295 secreted micronemal protein invasion effectors, thereby reducing invasion efficiency.

296

## 297 **6. VAC alterations reduce endolysosomal protease proteins and transcripts.**

298 The swollen VAC and its aberrant co-localization with the ELC in the  $\Delta crt$  parasites could conceivably  
299 lead to altered gene transcription to assist in the adaptation of these parasites. We conducted  
300 transcriptome sequencing to detect global alterations in gene transcription for  $\Delta crt$  parasites relative to WT.

301 The differential gene expression analysis identified 102 genes whose transcript levels changed greater  
302 than 1.5-fold in the  $\Delta crt$  strain. Forty-six and fifty-six genes had increased and reduced transcripts,  
303 respectively (**Fig 5A and Table S1**).

304

305 Four proteases were among the list of genes showing reduced transcripts in the  $\Delta crt$  mutant, including  
306 one putative aminopeptidase N protein (TgAMN, TGGT1\_221310), one putative Pro-Xaa serine  
307 carboxypeptidase (TgSCP, TGGT1\_254010), aspartyl protease 1 (TgASP1, TGGT1\_201840), and an ICE  
308 family protease-like protein (TgICEL, TGGT1\_243298). We validated transcript levels for these proteases,  
309 as well as two known VAC luminal proteases (TgCPL and TgCPB), in WT,  $\Delta crt$ , and  $\Delta crt CRT$  strains by  
310 qPCR. The qPCR analysis showed that the transcript levels of TgAMN, TgSCP, TgASP1, and TgCPB  
311 were decreased by 50%, 20%, 47%, and 14%, respectively, in  $\Delta crt$  parasites (**Fig 5B**). Protein levels of  
312 TgCPL and TgCPB were quantified by immunoblotting and compared for WT,  $\Delta crt$ , and  $\Delta crt CRT$  parasites.  
313 Although TgCPL transcript levels did not differ, abundance of TgCPL protein was decreased ~25% in the  
314  $\Delta crt$  mutant (**Fig 5C**). TgCPB expression was reduced and both the pro- and mature forms of TgCPB  
315 protein were reduced relative to WT parasites. (**Fig 5C**).

316

317 To determine the subcellular locations of these down-regulated proteases, we tagged endogenous  
318 TgAMN and TgSCP with 3xHA and 3xmyc epitope tags at their C-termini in WT parasites, respectively  
319 (**Fig S2**). After drug-selection, we probed cell lysates from these tagged strains with anti-HA and anti-myc  
320 antibodies, respectively, to test expression. Immunoblotting revealed that the observed molecular mass of  
321 both proteins was similar to the predicted size based on primary sequences (**Fig 5D**). Next, the tagged  
322 strains were co-stained with antibodies recognizing the epitope tags along with anti-TgCPL and anti-VP1  
323 antibodies to determine subcellular location. Immunofluorescence microscopy revealed both TgSCP and  
324 TgAMN to be in the VAC/ELC (**Fig 5D**) TgASP1 subcellular location was also determined to be within the  
325 VAC (data not shown; Dou, Z. *et al.*, in preparation). Collectively, these data suggest that the swollen VAC  
326 in  $\Delta crt$  parasites causes reduced transcription and translation of several endolysosomal proteases.

327

328 **7. Suppression of proteolysis within the swollen  $\Delta crt$  VAC partially restores VAC size, organellar**  
329 **separation, and invasion.**

330 We suspected that inhibition of proteolysis might reduce the size of the swelled VAC. We tested this  
331 hypothesis by chemically and genetically suppressing VAC proteolysis. First, we treated WT,  $\Delta crt$ , and  
332  $\Delta crt CRT$  parasites with 1  $\mu$ M LHVS, an irreversible inhibitor of TgCPL protease [23]. As mentioned TgCPL  
333 is a major endopeptidase involved in the maturation of micronemal proteins and digestion of host proteins  
334 [4,10]. Infected host cells were incubated with LHVS for 48 hrs to allow full inhibition of TgCPL. Treated  
335 parasites were liberated from host cells and used to infect new host cells for 30 minutes, followed by TgCPL  
336 staining to quantify the size of the VAC. As expected, LHVS-treated  $\Delta crt$  parasites displayed smaller VACs  
337 than DMSO-treated  $\Delta crt$  parasites (**Fig 6A**). TgCPB is another known VAC-localizing protease, displaying  
338 both endo- and exo-peptidase activities [13,23]. Due to its carboxypeptidase activity, it is expected that  
339 TgCPB generates more small solutes relative to TgCPL. We used CRISPR-Cas9 editing to generate a  
340  $\Delta crt \Delta cpb$  double knockout (**Fig 6B**). The replacement of *TgCPB* with a pyrimethamine resistance cassette  
341 was confirmed by PCR and immunoblotting (**Fig 6B**). The resulting  $\Delta crt \Delta cpb$  mutant showed a smaller  
342 concave subcellular structure compared to the  $\Delta crt$  mutant (**Fig S3**). The size of the VAC in WT,  $\Delta crt$ , and  
343  $\Delta crt \Delta cpb$  was quantified based on the TgCPL staining as described above and the  $\Delta crt \Delta cpb$  parasite VAC  
344 ( $0.85 \pm 0.15 \mu\text{m}$ ) was reduced by  $\sim 30\%$  compared to  $\Delta crt$  parasites ( $1.15 \pm 0.10 \mu\text{m}$ ) (**Fig 6C**). The  
345 moderate decrease in the size of the VAC in the  $\Delta crt \Delta cpb$  strain also reduced the number of parasites  
346 showing partial overlap between the VAC and ELC. Approximately 44% of  $\Delta crt \Delta cpb$  parasites showed  
347 partial overlap between TgCPL and proTgM2AP staining compared to 62% in the  $\Delta crt$  strain (**Fig 6D**), with  
348 both significantly higher than the 19% and 25% seen for WT and  $\Delta crt CRT$  strains, respectively. TgSUB1  
349 showed comparable expression in both the WT and  $\Delta crt \Delta cpb$  strains (**Fig 6E**). Similarly, TgSUB1 was  
350 observed in both constitutive and induced ESA fractions in the  $\Delta crt \Delta cpb$  parasites (**Fig 6F**). TgM2AP and  
351 TgMIC2 were cleaved by TgSUB1 in  $\Delta crt \Delta cpb$ , and their secretion patterns were similar to those seen in  
352 the WT strain (**Fig 6F**). These partially restored phenotypes in the  $\Delta crt \Delta cpb$  mutant improved the invasion  
353 efficiency by  $\sim 60\%$  compared to the  $\Delta crt$  strain, although invasion was still significantly lower than that of  
354 WT parasites (**Fig 6G**). Collectively, these data show a close association between the size of the VAC,



355 altered morphology of the parasite's endolysosomal system, protein abundance of TgSUB1, and parasite  
356 invasion.

357

## 358 **8. TgCRT is a functional transporter.**

359 Finally, we attempted to express TgCRT in *S. cerevisiae* yeast following previously described  
360 strategies for PfCRT [31,32]. Native *TgCRT* cDNA did not express well in *S. cerevisiae* yeast (**Fig S5**),  
361 however, following a previously published strategy for difficult to express PfCRT mutants [20] we created  
362 a fusion gene that replaced the 300 most N-terminal residues of the *TgCRT* sequence with 111 most N-  
363 terminal residues from *S. cerevisiae* plasma membrane ATPase (PMA), which harbors a yeast plasma  
364 membrane localization sequence (**Fig S4B and S4C**). Via alignment with PfCRT (**Fig S4A**), removing the  
365 300 N-terminal TgCRT residues that are non-homologous to PfCRT preserves all putative  
366 transmembraneous domains and inter helical loop regions. The fusion protein was well expressed in *S.*  
367 *cerevisiae* (**Fig S5**). Following an approach previously described for PfCRT and PfCRT mutants [20,33]  
368 we assayed PMA-TgCRT expressing yeast for chloroquine (CQ) transport (**Fig. 7A**). Via alignment with  
369 PfCRT (**Fig S4A**), TgCRT T369 corresponds to the well-studied K76 residue within PfCRT; previously,  
370 mutation of PfCRT K76 to T has been shown to increase the efficiency of CQ transport by PfCRT [20,34,35].  
371 We individually expressed both WT TgCRT and a T369K variant in the yeast to measure their transport  
372 efficiencies. Both the wild type protein and a TgCRT T369K mutant were found to transport CQ slower  
373 than PfCRT under similar conditions and to require higher external [CQ] (80 mM versus 16 mM for PfCRT)  
374 to achieve similar levels of transport (**Fig 7A**). These initial data have shown that mutation of the  
375 corresponding TgCRT threonine to lysine affects CQ transport similarly.

376

377 We also exchanged threonine for lysine in the WT TgCRT complementation construct and transfected  
378  $\Delta crt$  to examine the extent to which TgCRT<sup>T369K</sup> affects VAC size in *Toxoplasma* parasites. Interestingly,  
379 in contrast to full recovery of VAC size in the WT TgCRT complementation strain, TgCRT<sup>T369K</sup> only partially  
380 restored the swollen VAC (**Fig 7B**). These findings, along with the TgCRT transport data, strongly suggest

381 that the swollen VAC is caused by luminal osmolyte excess, similar to findings for PfCRT as described in  
382 "Discussion".

383

384 In summary, our findings strongly suggest a role for TgCRT in small solute transport that regulates  
385 VAC volume, similar to the role proposed for PfCRT [16,17]. However, at least for *T. gondii*, osmotic  
386 pressure within this organelle regulated by the TgCRT protein governs proper segregation of other  
387 organelles within the endolysosomal system that, in turn, facilitates microneme secretion and parasite  
388 invasion. The data also indicate that the invasion deficiency exhibited by the  $\Delta crt$  mutant is likely due to  
389 multiple factors, since the recovery of TgSUB1 expression and micronemal trimming in  $\Delta crt\Delta cpb$  did not  
390 completely reverse invasion defects. To our best knowledge, this is the first observation of regulation of  
391 apicomplexan parasite invasion by a CRT protein.

392

### 393 Discussion

394 *Toxoplasma* utilizes an endolysosomal system to secrete invasion effectors that disseminate infection.  
395 These invasion effectors undergo a series of intracellular proteolytic cleavage and trimming steps to reach  
396 their final forms. Therefore, maintenance of the integrity of the endolysosomal system is critical for  
397 controlling the secretion of invasion effectors in *Toxoplasma*. The Vacuolar Compartment (VAC) is an  
398 acidic lysosome-like vacuole. Previous work showed that deletion of a cathepsin L-like protease, a major  
399 VAC luminal endopeptidase, leads to invasion, replication, and virulence defects [4,10]. Compromised  
400 proteolytic activities within these parasites also result in the inefficient degradation of endocytosed host  
401 proteins [10]. Warring *et al.* previously reported that a *Toxoplasma* ortholog of chloroquine resistance  
402 transporter (TgCRT) resides in the VAC and that decreased expression of TgCRT leads to swelling of the  
403 VAC [14].

404

405 Here, we created a *TgCRT* knockout that completely removes *TgCRT* from the VAC membrane. The  
406 resulting  $\Delta crt$  strain shows a dramatic increase in VAC size, and the organelle aberrantly co-localizes with  
407 the adjacent endosome-like compartment (**Fig 8**). Although a previous study reported that parasites deliver



408 minor amounts of TgCPL to the ELC which then contributes to maturation of some micronemal proteins  
409 [4], our data do not reveal abnormal intracellular cleavage or trafficking of micronemal proteins in  $\Delta crt$   
410 parasites. Relatedly, Dogga *et al.* recently documented that aspartic acid protease 3 (TgASP3) localizes  
411 in a post-Golgi compartment and serves as a major maturase for invasion effectors [5], suggesting that the  
412 cleavage of micronemal proteins by TgCPL in the ELC plays only a minor role in their maturation.

413

414 We also measured the retention and secretion of micronemal proteins on the parasite's surface and in  
415 the medium executed by TgROM4 and TgSUB1, respectively. We found that the micronemal proteins were  
416 improperly trimmed on the surface of  $\Delta crt$  parasites. Patterns of secreted micronemal proteins observed  
417 for the  $\Delta crt$  mutant were similar to those for  $\Delta sub1$  parasites, which led us to examine the expression of  
418 TgSUB1 in  $\Delta crt$  parasites and ESAs. As expected, levels of TgSUB1 were decreased on the surface of  
419  $\Delta crt$  parasites and in the medium during secretion. Interestingly, the steady state abundance of TgSUB1  
420 was also significantly decreased in the  $\Delta crt$  mutant. Surprisingly, we found that the reduction of TgSUB1  
421 was due to a decrease in the transcription level of TgSUB1 in the  $\Delta crt$  strain, suggesting that the parasites  
422 utilize a feedback transcriptional mechanism to regulate TgSUB1.

423

424 TgSUB1 is a micronemal GPI anchored protein. It remains unclear how TgSUB1 becomes activated  
425 within *Toxoplasma*. Previous pulse-chase experiments have revealed that TgSUB1 undergoes maturation  
426 in a post-ER compartment, and passes through the endolysosomal system before its arrival at the  
427 microneme and subsequent secretion [11]. The propeptide region of TgSUB1 carries targeting information  
428 which helps to guide the protein to the microneme [36]. The propeptide may also function by binding to  
429 active sites of mature TgSUB1 to inhibit its proteolytic activity during trafficking. Co-localization of the VAC  
430 and ELC could bring propeptide-bound TgSUB1 to a protease-abundant environment, where non-specific  
431 digestion of the propeptide could then lead to increased digestive activities in the VAC and ultimately result  
432 in an increase in osmotic pressure within the hybrid VAC/ELC organelle (**Fig 8**). During this scenario, the  
433 parasites may utilize a feedback mechanism to repress additional expression of TgSUB1 in order to avoid  
434 further VAC swelling. Moreover, we also discovered that the  $\Delta crt$  parasites had reduced protein and/or

435 transcript levels of several other proteases, including two known VAC proteases, TgCPL and TgCPB.  
436 Therefore, the parasites down-regulate a number of endolysosomal-VAC proteases to suppress proteolytic  
437 activities in the swollen VAC, presumably to reduce osmotic pressure and thereby control VAC size.  
438 Among these proteases, TgSUB1 has been shown to be involved in parasite invasion and virulence defects  
439 but not replication and egress [3]. Additionally, TgCPL plays a role in parasite invasion by maturing several  
440 micronemal proteins [4]. Therefore, the invasion defects exhibited in the  $\Delta crt$  mutant could be due to  
441 several factors.

442

443 Altered endolysosomal protease transcript levels in  $\Delta crt$  parasites suggest that parasites repress  
444 transcription factors or enhance transcription repressors to respond to increased VAC size. RNA-Seq  
445 analysis did not reveal any changes in the AP2-family of transcription factors (data not shown). In  
446 mammalian cells, the transcription factor EB (TFEB) is a master regulator that drives gene expression for  
447 autophagy and lysosome biogenesis [37]. Search of the *Toxoplasma* genome did not reveal a TgTFEB  
448 ortholog, suggesting that these parasites may adopt an alternative strategy for regulating lysosomal gene  
449 expression. Interestingly, our differential gene expression analysis identified that the transcript levels of  
450 two zinc finger (CCCH) type motif-containing proteins, TGGT1\_246200 and TGGT1\_226310, were  
451 increased and decreased by 2-fold and 3-fold (**Table S1**), respectively, in the  $\Delta crt$  mutant. The CCCH type  
452 zinc finger motif-containing protein is known to regulate the stability of mRNA [38]. For example,  
453 tristetraprolin inhibits the production of tumor necrosis factor- $\alpha$  in macrophages by destabilizing its mRNA  
454 via an interaction with AU-rich elements at the 3'-untranslated region [39]. Further investigation to identify  
455 transcription factor(s) and regulator(s) that govern the expression of *Toxoplasma* lysosomal genes will help  
456 elucidate how these parasites regulate the biogenesis and function of the VAC.

457

458 In this study, we have determined that *TgCRT*-deficient parasites have reduced expression of several  
459 endolysosomal proteases. We have also found that suppression of proteolytic activities within the swollen  
460 VAC decreases the size of the organelle. These findings, along with data verifying that TgCRT is indeed a  
461 transporter with function similar to that of PfCRT, support the idea that TgCRT functions to transport

462 essential VAC osmolytes, similar to proposals for PfCRT [16,17,40]. Likely candidate osmolytes include  
463 ions and/or amino acids. We suggest that when TgCRT is absent on the membrane of the VAC, protein  
464 degradation products (short peptides, amino acids) likely accumulate within the VAC and increase osmotic  
465 pressure, thereby leading to the swollen phenotype. Consistent with this idea, and similar to related  
466 observations for *P. falciparum* treated with cysteine protease inhibitors [41], chemical inhibition of  
467 proteolysis via the small inhibitor LHVS dramatically reduces the size of the VAC. For *Toxoplasma*, LHVS  
468 principally targets TgCPL, but also binds to TgCPB protease [13]. Additionally, the maturation of TgCPB  
469 is dependent upon the presence of TgCPL [13]. Therefore, the treatment of LHVS blocks both of these  
470 VAC proteases. Since the cathepsin B (TgCPB) protease exhibits endo- and exo-peptidase activities, and  
471 the deletion of TgCPB had no effect on the abundance of TgCPL [13], we genetically ablated *TgCPB* to  
472 further understand its role in regulating VAC morphology. The deletion of *TgCPB* partially restored the size  
473 of the VAC, secretion patterns of micronemal proteins, and invasion defects. These results reveal for the  
474 first time that TgCPB plays an active role in contributing to proteolysis within the VAC in *Toxoplasma*  
475 parasites.

476

477 RNA-Seq analysis identified several other genes with altered transcription levels, suggesting that the  
478 parasites may utilize additional strategies to control VAC size. For example, interestingly, levels of  
479 aquaporin (TGGT1\_215450) transcript were reduced in  $\Delta crt$  parasites. Previous work showed that this  
480 aquaporin is localized to the VAC/PLV [42]. Therefore, it seems likely that  $\Delta crt$  parasites express less  
481 aquaporin to reduce water transport into the VAC/PLV, as an additional tactic to limit VAC swelling. We  
482 also found that two putative protein phosphatase 2C (TGGT1\_276920 and TGGT1\_201520) transcripts  
483 are down-regulated in the  $\Delta crt$  mutant. Both carry signal peptides, indicating endosomal trafficking.  
484 TGGT1\_276920 and TGGT1\_201520 are homologous to PTC3 and PTC1 in *S. cerevisiae*, respectively.  
485 Interestingly, both PTC1 and PTC3 proteins are involved in yeast osmosensory regulation. A mitogen-  
486 activated protein kinase pathway is activated when yeast cells experience hyperosmotic conditions. PTC1  
487 and PTC3 negatively regulate this pathway [43,44]. Furthermore, PTC1 was found to control the function  
488 and morphology of the yeast vacuole, which further alters its biogenesis [45]. The dramatic change in

489 *Toxoplasma* VAC volume indicates induced osmotic stress in the  $\Delta crt$  parasites. The knockout parasites  
490 appear to be utilizing a similar mechanism to suppress these protein phosphatases and enhance similar  
491 osmoregulatory signaling. We suggest similar studies for *P. falciparum* and other apicomplexan parasites  
492 that express CRT orthologs would be informative.

493

494 The phenotype of the swollen VAC in the  $\Delta crt$  strain mirrors the enlarged digestive vacuole in  
495 chloroquine (CQ) resistant (CQR) *P. falciparum* malaria [16]. Peptidomic analysis showed that hemoglobin  
496 is not as efficiently degraded within the digestive vacuole (DV) in CQR malaria parasites [40], further  
497 suggesting that CQR mutations in PfCRT alter the physiology within the swollen digestive vacuole, thereby  
498 compromising DV proteolytic activities. *In vitro* assays utilizing recombinant PfCRT, reconstituted in  
499 proteoliposomes, have revealed that PfCRT may act as a proton gradient dependent, polyspecific nutrient  
500 exporter for small solutes including amino acids, oligopeptides, glutathione, and small drugs [18,19]. These  
501 studies also demonstrate that CQR-associated PfCRTs display altered transport efficiency relative to CQ-  
502 associated PfCRT. Our study has revealed that TgCRT mediates CQ transport similar to PfCRT. The  $\Delta crt$   
503 strain appears more sensitive to CQ relative to WT parasites (**Fig S6**), further suggesting that TgCRT is a  
504 functional transporter of small solutes across the membrane of the VAC. We suggest that alteration of  
505 proteolytic activities in the enlarged VAC of the  $\Delta crt$  mutant reveals a similar scenario relative to the CQR  
506 *P. falciparum* DV. Given the similarity in components and functionality of the VAC and DV found in  
507 *Toxoplasma* and *Plasmodium*, this *Toxoplasma* TgCRT-deficient mutant should prove useful for further  
508 studying the native function of CRT orthologs from other apicomplexan parasites.

509

510 In sum, our findings reveal that the *Toxoplasma* TgCRT protein is indeed a small molecule transporter  
511 that plays an essential role in regulating the size and morphology of the VAC. Unexpectedly, this regulation  
512 maintains integrity of the parasite's endolysosomal system, which is essential for the trafficking of invasion  
513 effectors. Co-localization of the VAC and endosome-like compartment in the TgCRT knockout led to a  
514 reduction in transcript and protein levels for several endolysosomal proteases. We found that blocking  
515 normal proteolysis within the swollen VAC reduced the size and partially restored the morphology of the

516 organelle. Taken together, these findings suggest that TgCRT mediates the transport of small solutes in  
517 order to regulate VAC size and morphology. The data show that the integrity of the parasite endolysosomal  
518 system is critical for parasite virulence. We suggest that pharmaceutical modulation of the VAC could serve  
519 as a novel strategy for managing toxoplasmosis.

520

## 521 **Materials and Methods**

### 522 **Ethical statement**

523 This study was performed in compliance with the Public Health Service Policy on Humane Care and  
524 Use of Laboratory Animals and Association for the Assessment and Accreditation of Laboratory Animal  
525 Care guidelines. The animal protocol was approved by Clemson University's Institutional Animal Care and  
526 Use Committee (Animal Welfare Assurance A3737-01, protocol number AUP2016-012). All efforts were  
527 made to minimize discomfort. This method of euthanasia is consistent with the recommendations of the  
528 Panel on Euthanasia of the American Veterinary Medical Association.

529

### 530 **Chemicals and reagents**

531 Morpholine urea-leucyl-homophenyl-vinyl sulfone phenyl (LHVS) was kindly provided by the Bogyo  
532 lab at Stanford University. Other chemicals used in this work were analytical grade and were purchased  
533 from VWR unless otherwise indicated.

### 534 **Parasite culture**

535 *Toxoplasma gondii* parasites were cultured in human foreskin fibroblast (HFF) cells (ATCC, SCRC-  
536 1041) in Dulbecco's Modified Eagle Medium (DMEM) media supplemented with 10% cosmic calf serum at  
537 37 °C with 5% CO<sub>2</sub>. The parasites were harvested by membrane filtration as described previously [13].

538

### 539 **Generation of transgenic parasites**

540 To generate the TgCRT-deficient strain, ~1.5 kilobases (kb) of the 5'- and 3'-UTR of the *TgCRT* gene,  
541 respectively, were PCR-amplified and flanked at both ends of the bleomycin resistance cassette (BLE) to  
542 assemble a *TgCRT* deletion construct. The resulting plasmids were introduced into WT parasites by  
543 electroporation. The transfected parasites were selected with 50 µg/ml bleomycin twice, while in their  
544 extracellular stage as described previously [13]. Clones of the TgCRT-deficient parasites were isolated by  
545 limiting dilution. The correct replacement of *TgCRT* with the *BLE* cassette was confirmed by quantitative  
546 PCR (see text).

547

548 To complement  $\Delta crt$  parasites, we modified the plasmid pTub-TgCRT-mCherry-3xmyc (a gift from the  
549 van Dooren lab), which expresses a C-terminally mCherry-3xmyc epitope-tagged TgCRT under the  
550 *Toxoplasma* tubulin promoter. The plasmid was restricted with HpaI and MfeI to remove the tubulin  
551 promoter and a segment of *TgCRT*. The remaining DNA fragment served as the backbone for subsequent  
552 Gibson assembly to incorporate a PCR amplified ~1 kb region upstream of the *Tgku80* gene, the ~1 kb  
553 fragment of the *Tgcrt* 5'-UTR region, and the removed partial *Tgcrt* coding sequence to produce the TgCRT  
554 complementation plasmid, pCRT-TgCRT-mCherry-3xmyc. The complemented TgCRT is driven by its  
555 cognate promoter to maintain physiologic similarity to native TgCRT expression in WT parasites (see text).  
556 The 1 kb region located ~6 kb upstream of the *Tgku80* gene was used to facilitate a single integration of  
557 the TgCRT complementation plasmid into this specific locus by single crossover homologous  
558 recombination. The TgCRT complementation construct was digested with Swal restriction enzyme, gel-  
559 extracted, purified, and transfected into  $\Delta crt$  parasites by electroporation.

560

561 To introduce NanoLuc<sup>®</sup> luciferase (nLuc) into parasites, we PCR-amplified and assembled the  
562 *Tgtubulin* promoter, the coding sequence of the nLuc luciferase, and an HXG selection marker into an  
563 nLuc expression construct. The resulting plasmid was transfected into WT,  $\Delta crt$ , and  $\Delta crtCRT$  strains. The  
564 transfectants were selected with 25  $\mu$ g/ml mycophenolic acid and 50  $\mu$ g/ml xanthine. Stable populations  
565 were subjected to limiting dilution to generate individual clones of WT::nLuc,  $\Delta crt$ ::nLuc, and  $\Delta crtCRT$ ::nLuc  
566 and clones were confirmed via luciferase activity.

567

568 To generate the  $\Delta crt\Delta cpb$  mutant, the *TgCPB* gene was replaced with a pyrimethamine resistance  
569 cassette using the CRISPR-Cas9 genome editing system [46,47]. The pyrimethamine resistance cassette  
570 was PCR-amplified and flanked by 50 bp regions upstream and downstream of the start and stop codons  
571 of the *TgCPB* gene for homologous recombination. A 20 bp region located at the beginning of the coding  
572 region of the *TgCPB* gene was used to design guide RNA and replace the guide RNA targeting TgUPRT  
573 gene in the plasmid pSAG1-Cas9::UPRTsgRNA using Q5 site-directed mutagenesis (NEB). The Cas9-  
574 GFP and guide RNA constructs were co-transfected into  $\Delta crt$  parasites with the corresponding repair PCR

575 product. The guide RNA and Cas9 generated a gap within the *TgCPB* gene to facilitate double crossover  
576 homologous recombination. Correct gene replacement was confirmed by PCR.

577

578 To epitope-tag TgAMN, we again used CRISPR-Cas9 editing tools to modify the corresponding gene.  
579 Guide RNA recognizing the 20 bp region near the TgAMN stop codon was generated using the methods  
580 above.

581

582 The 50-bp homologous regions upstream and downstream of the stop codon of the *TgAMN* gene were  
583 cloned at the 5'- and 3'-ends of the DNA sequence containing the 3xHA epitope tag and the pyrimethamine  
584 resistance cassette, respectively, by PCR. The plasmid encoding the guide RNA targeting TgAMN and  
585 Cas9-GFP and the PCR product were co-transfected into WT parasites. The stop codon of TgAMN was  
586 replaced by the 3xHA epitope tag and pyrimethamine resistance cassette. Stable populations were  
587 generated after multiple rounds of pyrimethamine selection and TgAMN-3xHA fusion protein was  
588 confirmed by immunoblotting analysis.

589

590 TgSCP was endogenously tagged with a 3xmyc epitope tag via single crossover. An approximately 1  
591 kb region upstream of the *TgSCP* stop codon was PCR amplified and fused in frame with a 3xmyc epitope  
592 to assemble TgSCP-3xmyc. A pyrimethamine resistance cassette was also included, the resulting plasmid  
593 was linearized and transfected into WT parasites. The correct tagging was confirmed by immunoblotting.

594

### 595 **Site-directed mutagenesis**

596 Threonine 369 was mutated to lysine in the WT TgCRT complementation construct, via site directed  
597 mutagenesis according to the Q5<sup>®</sup> site-directed mutagenesis procedure (NEB). Linear PCR product was  
598 phosphorylated, circularized, and transformed into *E. coli*. Correct clones were identified by direct DNA  
599 sequencing.

600

### 601 **Transfection of *Toxoplasma* parasites**



602 *T. gondii* parasites were allowed to grow in HFF cells for 48 hrs at 37 °C with 5% CO<sub>2</sub>. Freshly egressed  
603 parasites were syringed, filter purified, and harvested in Cytomix buffer (25 mM HEPES, pH 7.6, 120 mM  
604 KCl, 10 mM K<sub>2</sub>HPO<sub>4</sub>/ KH<sub>2</sub>PO<sub>4</sub>, 5 mM MgCl<sub>2</sub>, 0.15 mM CaCl<sub>2</sub>, and 2 mM EGTA). Parasites were pelleted  
605 at 1,000x *g* for 10 min, washed once in Cytomix buffer, and resuspended in Cytomix buffer at 2.5 x 10<sup>7</sup>  
606 parasites per ml. 400 µL of parasite suspension was mixed with 20 µg DNA and 2 mM ATP/5 mM reduced  
607 glutathione to a final volume of 500 µL. The mixture was electroporated at 2 kV and 50 ohm resistance  
608 using the BTX Gemini X2 (Harvard Apparatus). Transfectants were inoculated into a T25 flask pre-seeded  
609 with confluent monolayer of HFF cells and the cells allowed to recover. Drug selection was applied 24 hrs  
610 post transfection.

611

### 612 **Immunofluorescence**

613 Freshly lysed parasites were used to infect confluent HFF cells pre-seeded in an 8-well chamber slide  
614 for 1 hr (pulse invaded parasites) or 18-24 hrs (replicated parasites). The extracellular parasites were  
615 attached to chamber slides using 0.1% (w/v) poly-L-lysine. Immunofluorescence was performed as  
616 described previously [10,13]. Images were viewed and digitally captured using a Leica<sup>®</sup> CCD camera  
617 equipped with a DMI8 inverted epifluorescence microscope and processed with Leica<sup>®</sup> LAS X software.

618

### 619 **Excretory secretory antigens (ESAs) preparation**

620 Freshly egressed parasites were syringed, filter purified, and resuspended at 5 x 10<sup>8</sup> parasites/ml in  
621 D1 medium (DMEM medium supplemented with 1% FBS). 100 µL of parasite suspension was transferred  
622 to a microfuge tube and incubated at 37 °C for 30 min to prepare constitutive ESAs. To isolate induced  
623 ESAs, the parasite suspension was incubated in D1 medium supplemented with 1% ethanol for 2 min at  
624 37°C. ESAs were separated from intact parasites by centrifugation at 1,000 x *g* for 10 min. ESA fractions  
625 were transferred to a new microfuge tube, mixed with SDS-PAGE sample loading buffer, and boiled for 5  
626 min for immunoblotting analysis.

627

### 628 **SDS-PAGE and Immunoblotting**

629 Parasite lysates and ESA fractions were prepared in 1x SDS-PAGE sample buffer and boiled for 5 min  
630 before resolving on standard SDS-PAGE gels. For immunoblotting, gels were transferred to PVDF  
631 membranes by semi-dry protein transfer methods. Blots were blocked with 5% non-fat milk and incubated  
632 with primary antibody diluted in 1% non-fat milk. Goat anti-mouse or anti-rabbit IgG antibodies conjugated  
633 with horseradish peroxidase were used as secondary antibody. Immunoblots were developed with  
634 SuperSignal™ WestPico chemiluminescent substrate (Thermo). The chemiluminescence signals were  
635 captured using the Azure® Imaging System. Bands were quantified by densitometry using LI-COR® Image  
636 Studio software.

637

### 638 **Parasite invasion assay**

639 The red-green invasion assay was used to measure the efficiency of parasite invasion. Freshly purified  
640 parasites were syringed, filter purified, and resuspended at  $5 \times 10^7$  parasites/ml in invasion medium (DMEM  
641 supplemented with 3% FBS). 200  $\mu$ L of parasite resuspension was inoculated into each well of an 8-well  
642 chamber slide pre-seeded with HFF cells, and parasites were allowed to invade host cells for 30, 60, and  
643 120 min before fixation with 4% formaldehyde for 20 min. Before membrane permeabilization, slides were  
644 stained with mouse anti-TgSAG1 monoclonal antibody (1:1,000) for 1 hr to label attached parasites. After  
645 treatment with 0.1% Triton X-100 for 10 min, the parasites were stained with rabbit polyclonal anti-TgMIC5  
646 antibody (1:1,000) for 1 hr to stain both invaded and attached parasites. Subsequently, slides were stained  
647 with goat anti-mouse IgG conjugated with Alexa 594 (red) (Invitrogen, 1:1,000) and goat anti-rabbit IgG  
648 conjugated with Alexa 588 (green) (Invitrogen, 1:1,000) along with DAPI for nuclear staining. After staining,  
649 slides were mounted with anti-fade Mowiol solution and observed by immunofluorescence. Extracellular  
650 parasites only showed red fluorescence, whereas intracellular parasites exhibited both red and green  
651 fluorescence. Six fields of view from individual invasion experiments were captured by a Leica® DMI8  
652 inverted epifluorescence microscope and processed with ImageJ software. The attachment efficiency of  
653 each strain was measured by dividing the total number of parasites labeled in red by the total number of  
654 host nuclei, and normalized against that of WT parasites. The invasion efficiency of each strain was

655 quantified using the following equation ( $[\text{sum of green parasites}] - [\text{sum red parasites}] / \text{total host nuclei}$ ),  
656 and data were normalized against data for WT parasites.

657

### 658 **Immunofluorescence-based replication assay**

659 Freshly egressed parasites were filter-purified and inoculated into individual wells of an 8-well chamber  
660 slide pre-seeded with HFF cells at approximately  $1 \times 10^5$  cells per well. Non-invaded parasites were  
661 washed off at 4 hrs post-infection. Invaded parasites were allowed to infect host cells for an additional 24  
662 and 32 hrs before fixation. The infected host cells were stained with monoclonal anti-TgGRA7 (1:1,000)  
663 antibody and DAPI to help distinguish individual parasitophorous vacuoles (PVs) and the nuclei of  
664 parasites, respectively. Slides were subjected to standard immunofluorescence microscopy for imaging.  
665 100 parasitophorous vacuoles were enumerated for each strain and plotted as the distribution of different  
666 sized PVs. In addition, replication was also expressed as the average number of parasites per PV.

667

### 668 **Luminescence-based growth assay**

669 Parasites expressing NanoLuc luciferase were inoculated into a white 96-well tissue culture plate with  
670 a flat, solid bottom (Greiner Bio-One) pre-seeded with confluent HFF cells at  $1.5 \times 10^3$  cells/well. Each  
671 strain was inoculated into 4 individual wells to monitor the fold-change of luciferase activity versus time,  
672 which is proportional to intracellular growth. At 4 hrs post-infection, the individual wells were aspirated to  
673 remove non-invaded parasites. The first well was treated with 100  $\mu\text{L}$  of lysis buffer containing NanoLuc  
674 luciferase substrate and incubated for 10 min, and a luminescence reading was taken by using the BioTek®  
675 multimode H1 hybrid plate reader. The remainder of the 3 wells were replenished with fresh D10 medium  
676 without phenol red for an additional 24, 48, and 72 hrs. Subsequent luminescence readings were all  
677 performed via the methods above. Luminescence readings versus time were normalized against the  
678 reading at 4 hrs post-infection to calculate the fold-change of parasite growth.

679

### 680 **Egress assay**

681 A Lactate dehydrogenase release assay was used to measure the egress efficiency of parasites.  
682 Freshly lysed parasites were filter-purified and resuspended in D10 medium at  $5 \times 10^5$  parasites/ml. 100  
683  $\mu$ L of parasite suspension was inoculated into each well of a 96-well plate pre-seeded with HFF cells. The  
684 parasites were allowed to replicate for 18-24 hrs, washed, and incubated with 50  $\mu$ L of Ringer's buffer (10  
685 mM HEPES, pH 7.2, 3 mM  $\text{H}_2\text{PO}_4$ , 1 mM  $\text{MgCl}_2$ , 2 mM  $\text{CaCl}_2$ , 3 mM KCl, 115 mM NaCl, 10 mM glucose,  
686 and 1% FBS) for 20 min. Subsequently, an equal volume of 1 mM Zaprinast dissolved in Ringer's buffer  
687 was added to the wells and incubated for 5 min at 37°C and 5%  $\text{CO}_2$ . Uninfected wells were treated with  
688 50  $\mu$ L of Ringer's buffer containing 1% Triton X-100 or normal Ringer's buffer, serving as positive and  
689 negative controls, respectively. The released lactate dehydrogenase was centrifuged at 1,000 x g for 5  
690 min twice to pellet insoluble cell debris. Fifty microliters of supernatant was subjected to the standard  
691 lactate dehydrogenase release assay as described previously [48]. The egress efficiency of each strain  
692 was calculated using the following equation,  $([\text{LDH activity derived from individual parasites}] - [\text{LDH activity}$   
693  $\text{of negative control}]) / ([\text{LDH activity of positive control}] - [\text{LDH activity of negative control}])$ , and normalized  
694 against data for WT parasites.

695

#### 696 **Size measurement of the VAC**

697 The size of the VAC was quantified based on TgCPL staining (TgCPL is a VAC luminal protease).  
698 Freshly purified parasites were inoculated into pre-seeded HFF chamber slides, allowed to invade host  
699 cells for 30 min prior to fixation, stained with polyclonal rabbit anti-TgCPL antibody (1:100), and VAC  
700 diameter measured by immunofluorescence microscopy. The distance of the widest diagonal of TgCPL  
701 staining was used as the diameter of the VAC and was quantified using Leica® LAS X software.  
702 Measurements for 50 individual parasites were performed for each replicate, data are presented as  
703 average  $\pm$  S.D..

704

#### 705 **Transcriptome sequencing and quantitative PCR (qPCR) assay**

706 Total RNA was extracted from freshly lysed parasites using the Zymo® Direct-zol™ RNA MiniPrep Plus  
707 kit, and converted to sequencing read libraries using the TruSeq Stranded mRNA sequencing kit (Illumina).

708 The prepared libraries were subjected to 2 x 125 bp paired-end Illumina<sup>®</sup> HiSeq2500 sequencing. Each  
709 sample was sequenced to a depth of at least 20 million reads. Differential expression profiling was  
710 performed by the Clemson University Genomics Computational Lab.

711

712 Approximately 500 ng of total RNA was used to measure the steady levels of transcripts for individual  
713 genes by using the Luna<sup>®</sup> Universal One-Step RT-PCR kit (NEB). The qPCR assay was performed using  
714 the BioRad CFX96 Touch<sup>™</sup> Real-Time PCR detection system. The quantification cycle (Cq) values for  
715 individual genes were used for double delta Cq analysis to calculate their relative abundances to that of  
716 WT parasites using the Bio-Rad<sup>®</sup> CFX Maestro<sup>™</sup> software. TgActin was used as the housekeeping gene  
717 for normalization.

718

#### 719 **Mouse studies**

720 Six- to eight-week-old, outbred CD-1 mice were infected by subcutaneous or intravenous injection with  
721 100 WT or mutant parasites diluted in PBS. The infected mice were monitored for symptoms daily for a  
722 total of 30 days. Mice that appeared moribund were humanely euthanized via CO<sub>2</sub> overdose, in compliance  
723 with IACUC's approved protocol. The seroconversion of the surviving mice was tested by enzyme-linked  
724 immunosorbent assay (ELISA). The surviving mice were allowed to rest for 10 days, prior to subcutaneous  
725 injection with a challenge dose of 1000 WT parasites, and were monitored daily for survival for 30 days.

726

#### 727 **Generation of TgCRT expression construct in yeast**

728 *TgCRT* cDNA was PCR amplified from pTub-TgCRT-mCherry-3xmyc plasmid using a forward primer  
729 that introduced a 5' KpnI site and *S. cerevisiae* Kozak sequence, and a reverse primer that omitted the  
730 mCherry-3xmyc tag and introduced a 3' XmaJI site. The PCR amplified DNA was digested with KpnI and  
731 XmaJI and subcloned into pYES2-6xHis-BAD-V5 (hexa His, biotin acceptor domain, V5 tags) plasmid  
732 behind the GAL1 promoter and in front of the His-BAD-V5 epitope tags to generate the plasmid  
733 pYES/TgCRT-hbv. To generate the plasmid pYES/PMA-TgCRT-hbv, DNA encoding TgCRT-hbv was PCR  
734 amplified using a forward primer that omitted the first 900 bases of TgCRT and introduced a 5' SacI site,

735 and a reverse primer that included a 3' NotI site and His-BAD-V5 tags. The amplified DNA was digested  
736 with SacI and NotI and subcloned into a SacI/NotI-digested pYES/PfHB3<sub>PMA</sub> (from [32]; modified via site-  
737 directed mutagenesis to introduce a SacI site at the PMA-PfCRT interface). Mutagenesis reactions were  
738 performed using reagents obtained from Agilent (Santa Clara, CA).

739

#### 740 **Preparation of Yeast Membrane and Western blotting**

741 Isolation of yeast membranes and detection of proteins by Western blot were as described in [20].

742

#### 743 **Measurement of CQ incorporation in yeast expressing CRT**

744 Quantitative growth rate analysis was used to calculate CQ transport as previously described in detail  
745 elsewhere [20,32,33]. Briefly, growth under each condition was measured in duplicate at an initial cell  
746 density of OD<sub>600</sub>=0.1 in 96-well plates placed in a Tecan (Durham, NC) M200Pro or BioTek (Winooski, VT)  
747 Epoch2 plate reader. CQ-induced growth delays at 80 mM CQ, pH 6.75 were calculated as the difference  
748 in time taken to reach maximal growth rate in PMA-TgCRT non-inducing versus inducing media (see [33]).

749

#### 750 **Statistics**

751 Statistical analysis was performed using Prism software (GraphPad). The methods used in different  
752 assays were indicated in the figure legends.

**Table 1. Strains used in this study**

| <b>Name</b>                      | <b>Genetic background</b>                                                               | <b>Comments</b>                                                                                                                                                                                                             |
|----------------------------------|-----------------------------------------------------------------------------------------|-----------------------------------------------------------------------------------------------------------------------------------------------------------------------------------------------------------------------------|
| WT                               | RH $\Delta$ ku80 $\Delta$ hxg                                                           | Requested from the Carruthers Lab, not generated in this study                                                                                                                                                              |
| $\Delta$ crt                     | RH $\Delta$ ku80 $\Delta$ hxg $\Delta$ crt                                              | <i>TgCRT</i> was deleted by double crossover homologous recombination                                                                                                                                                       |
| $\Delta$ crtCRT                  | RH $\Delta$ ku80 $\Delta$ hxg $\Delta$ crt:: <i>TgCRT-mCherry-3xmyc</i>                 | Ectopic expression of a C-terminally epitope-tagged <i>TgCRT</i> in $\Delta$ crt for complementation                                                                                                                        |
| $\Delta$ crtCRT <sup>T369K</sup> | RH $\Delta$ ku80 $\Delta$ hxg $\Delta$ crt:: <i>TgCRT<sup>T369K</sup>-mCherry-3xmyc</i> | Ectopic expression of a C-terminally epitope-tagged <i>TgCRT</i> mutant in $\Delta$ crt for complementation. The original threonine at position 369 within <i>TgCRT</i> was changed to lysine by site-directed mutagenesis. |
| $\Delta$ crt $\Delta$ cpb        | RH $\Delta$ ku80 $\Delta$ hxg $\Delta$ crt $\Delta$ cpb                                 | The entire <i>TgCPB</i> gene was ablated by CRISPR-Cas9 based genome editing technique                                                                                                                                      |
| WT:: <i>nLuc</i>                 | RH $\Delta$ ku80 $\Delta$ hxg:: <i>nLuc</i>                                             | Expressed NanoLuc luciferase in WT parasites                                                                                                                                                                                |
| $\Delta$ crt:: <i>nLuc</i>       | RH $\Delta$ ku80 $\Delta$ hxg $\Delta$ crt:: <i>nLuc</i>                                | Expressed NanoLuc luciferase in $\Delta$ crt parasites                                                                                                                                                                      |
| $\Delta$ crtCRT:: <i>nLuc</i>    | RH $\Delta$ ku80 $\Delta$ hxg $\Delta$ crt:: <i>TgCRT-mCherry-3xmyc</i> :: <i>nLuc</i>  | Expressed NanoLuc luciferase in $\Delta$ crtCRT parasites                                                                                                                                                                   |
| TgAMN-3xHA                       | RH $\Delta$ ku80 $\Delta$ hxgTgAMN-3xHA                                                 | <i>TgAMN</i> gene was endogenously tagged with a 3xHA epitope at its 3'-end by CRISPR-Cas9 based genome editing technique                                                                                                   |
| TgSCP-3xmyc                      | RH $\Delta$ ku80 $\Delta$ hxgTgSCP-3xmyc                                                | <i>TgSCP</i> gene was endogenously tagged with a 3xmyc epitope at its 3'-end by single crossover recombination                                                                                                              |

753

754 **Data Availability Statement:** The raw data of transcriptomic sequencing of WT and  $\Delta crt$  strains have  
755 been deposited in the NIH Gene Expression Omnibus (GEO) database. The accession number is  
756 GSE116539. <https://www.ncbi.nlm.nih.gov/geo/query/acc.cgi?acc=GSE116539>

757

758 **Funding:** This work was supported by Knights Templar Eye Foundation Pediatric Ophthalmology Career-  
759 Starter Research Grant (to Z.D.), a pilot grant of an NIH COBRE grant P20GM109094 (to Z.D.), the  
760 Clemson Startup fund (to Z.D.), and NIHR01AI111962 and R01AI056312 (to P.D.R). The funders had no  
761 role in study design, data collection and analysis, decision to publish, or preparation of the manuscript.

762

763 **Competing Interests:** The authors have declared that no competing interests exist.

764

## 765 **Acknowledgments**

766 We thank our colleagues Drs. Michael Blackman, Peter Bradley, Vern Carruthers, Silvia Moreno, and  
767 David Sibley for kindly providing key reagents for this study. We also want to thank Drs. Rooksana Noorai  
768 and Vijay Shankar at Clemson University Genomics Computational Lab for providing technical assistance  
769 and expertise in performing transcriptomic sequencing and differential gene expression analysis and  
770 depositing the raw data files of transcriptomic sequencing into the NIH GEO database. We acknowledge  
771 Dr. Lesly Temesvari for critically reading this manuscript before submission.

772

## 773 **Author Contributions**

774 **Conceptualization:** Paul D. Roepe, Zhicheng Dou.

775 **Formal analysis:** L. Brock Thornton, Paige Teehan, Katherine Floyd, Christian Cochrane, Amy Bergmann,  
776 Bryce Riegel, Paul D. Roepe, Zhicheng Dou.

777 **Funding acquisition:** Paul D. Roepe, Zhicheng Dou.

778 **Investigation:** L. Brock Thornton, Paige Teehan, Katherine Floyd, Christian Cochrane, Amy Bergmann,  
779 Bryce Riegel, Zhicheng Dou.

780 **Methodology:** L. Brock Thornton, Paige Teehan, Bryce Riegel, Paul D. Roepe, Zhicheng Dou.



- 781 **Project administration:** Paul D. Roepe, Zhicheng Dou.
- 782 **Resources:** Paige Teehan, Amy Bergmann, Bryce Riegel, Zhicheng Dou.
- 783 **Supervision:** Paul D. Roepe, Zhicheng Dou.
- 784 **Writing – original draft:** Zhicheng Dou.
- 785 **Writing – review & editing:** L. Brock Thornton, Bryce Riegel, Paul D. Roepe, Zhicheng Dou.
- 786

787 **Figure legends:**

788 **Figure 1. The TgCRT-deficient parasites displayed a swollen digestive vacuole and a disrupted**  
789 **endolysosomal system. A)** Schematic illustration of the strategies for the *Tg crt* deletion and  
790 complementation in *Toxoplasma* parasites. The plasmid carrying a bleomycin resistance cassette (*BLE*)  
791 flanked by the *TgCRT* targeting sequences was transfected into WT parasites for double crossover  
792 replacement of *TgCRT* to produce the  $\Delta crt$  strain. The TgCRT complementation plasmid, containing the  
793 coding sequence of TgCRT fused with mCherry and 3xmyc epitope tags at its C-terminus, was introduced  
794 into the  $\Delta crt$  strain to produce the  $\Delta crt CRT$  complementation strain. **B)** The primers indicated in panel A  
795 were used to verify the correct replacement of *TgCRT* with *BLE* by PCR. **C)** The complemented *TgCRT*  
796 gene was transfected into  $\Delta crt$  parasites and was verified by PCR. Since we complemented  $\Delta crt$  with the  
797 coding sequence of *TgCRT*, the PCR product was a 0.2 kb fragment in the  $\Delta crt CRT$  strain, whereas  
798 showing a 1.5 kb product in the WT strain whose *TgCRT* gene contains the introns. **D)** Transcript levels of  
799 *TgCRT* in the WT,  $\Delta crt$ , and  $\Delta crt CRT$  strains were evaluated by quantitative PCR. Primers were designed  
800 to anneal to the exons of *TgCRT* and are indicated in panel A. The *Tgactin* gene was included as a control  
801 for normalization. The quantification of transcripts was performed in at least three biological replicates and  
802 analyzed using unpaired Student's *t*-test. **E)** Extracellular  $\Delta crt$  parasites showed an enlarged concave  
803 subcellular structure, indicated by the arrow, under the differential interference contrast (DIC) microscopy.  
804 Scale bar = 5  $\mu$ m. **F)** The swollen subcellular structure indicated by the arrowhead was also observed in  
805 pulse invaded  $\Delta crt$  parasites and co-localized with a major luminal peptidase of the VAC, cathepsin L-like  
806 protease (TgCPL). The TgCPL staining was used to assess the morphology of the VAC. The parasites  
807 were allowed to invade host cells for 30 min before TgCPL antibody staining. The distance of the widest  
808 diagonal of the TgCPL staining was determined to be the diameter of the VAC and was measured using  
809 the Leica<sup>®</sup> LAS X software. The measurements were conducted in three biological replicates.  
810 Measurements from 50 individual parasites from one representative assay were shown. The mean VAC  
811 size  $\pm$  SD was calculated for three independent measurements and is listed on the figure. Statistical  
812 significance was determined using unpaired Student's *t*-test. Scale bar = 2  $\mu$ m. **G)** Parasites were co-  
813 stained with anti-TgCPL (the marker of the VAC) and anti-proM2AP or anti-TgVP1 (both are the markers

814 of the endosome-like compartment, ELC). In pulse invaded parasites, the VAC and ELC staining were  
815 juxtaposed in the WT and  $\Delta crtCRT$  strains, but aberrantly co-localized in the  $\Delta crt$  strain. During replication,  
816 the VAC in WT and  $\Delta crtCRT$  parasites became fragmented. However, the abnormal co-localization of the  
817 VAC and ELC significantly decreased the extent of VAC fragmentation in the  $\Delta crt$  mutant. A major TgCPL  
818 punctum existed in the replicated  $\Delta crt$  parasites, not in WT and  $\Delta crtCRT$  strains, and co-localized with  
819 proTgM2AP and TgVP1 (indicated by arrows in the insets). The scale bars in the images of pulse invaded  
820 and replicated parasites are 2  $\mu\text{m}$  and 5  $\mu\text{m}$ , respectively. \*\*\*\*,  $p < 0.0001$ ; n.s., not significant.

821

822 **Figure 2. Parasite invasion and acute virulence were reduced in the  $\Delta crt$  parasites. A)** WT,  $\Delta crt$ , and  
823  $\Delta crtCRT$  parasites were allowed to invade host cells for 30, 60, and 120 min prior to fixation and antibody  
824 staining. Parasites and host cells within six fields of view were counted for each strain. At least three  
825 independent invasion assays were conducted for statistical analysis. The  $\Delta crt$  parasites showed a ~50%  
826 reduction in invasion at 30 min post-infection. The extent of the invasion defect in the  $\Delta crt$  mutant was  
827 gradually minimized overtime. At 60 min post-infection, there was approximately a 25% reduction in  
828 invasion in  $\Delta crt$  mutant, while there were no significant differences among the three strains at 120 min  
829 post-infection. The assay was performed at least in triplicate. Statistical significance was determined using  
830 unpaired Student's *t*-test. **B)** We infected confluent HFFs with WT,  $\Delta crt$ , and  $\Delta crtCRT$  parasites for 28 and  
831 40 hrs before fixation and staining. Infected cells were stained with DAPI and anti-TgGRA7 antibodies in  
832 order to recognize individual parasites and parasitophorous vacuoles, respectively. One hundred  
833 parasitophorous vacuoles (PVs) were enumerated for the number of parasites they contained and the  
834 distribution of different sized PVs was plotted. The average number of parasites per PV was also calculated  
835 and listed above the plots. In addition, the growth rates of these strains were determined at 24, 48, and 72  
836 hours by using a luminescence-based assay. Parasites were inoculated into a 96-well plate pre-seeded  
837 with HFFs prior to lysis and quantification of luminescence activities at pre-determined time intervals. At  
838 least three biological replicates were performed for the replication assay. Unpaired Student's *t*-test was  
839 performed to calculate the statistical significance of parasite growth between strains. **C)** To measure the  
840 egress of the parasites,  $5 \times 10^4$  parasites were used to infect confluent HFFs in a 96-well plate for 24 hrs.

841 Replicated parasites were treated with 500  $\mu$ M Zaprinast for 5 min at 37°C and 5% CO<sub>2</sub> to induce egress.  
842 Disruption of host cell membranes due to parasite egress released lactate dehydrogenase into the  
843 medium, which was quantified and plotted. Unpaired Student's *t*-test was used to calculate the statistical  
844 significance. There were no differences observed in parasite egress between WT and  $\Delta crt$  parasites. **D)**  
845 The acute virulence of TgCRT-deficient parasites was evaluated in a murine model via subcutaneous and  
846 intravenous infections. One hundred parasites from each strain were used to infect outbred CD-1 mice  
847 (n=10 mice for each strain). The mortality of the mice was monitored for 30 days. Seroconversion of the  
848 surviving mice was evaluated by ELISA to confirm successful infection. Additionally, the surviving mice  
849 were allowed to rest for 10 days before subsequent challenge with 1,000 WT parasites by subcutaneous  
850 inoculation. The  $\Delta crt$  mutant exhibited reduced acute virulence compared to the WT and  $\Delta crt CRT$  strains  
851 and conferred immunological protection in the surviving mice. Data were recorded and are presented using  
852 the Kaplan-Meier plot. Statistical analysis was performed using the Log-rank (Mantel-Cox) test. For all  
853 statistical significance calculation, \*,  $p < 0.05$ ; \*\*,  $p < 0.01$ ; \*\*\*\*,  $p < 0.0001$ ; n.s, not significant.

854

855 **Figure 3. The deletion of TgCRT altered microneme secretion, without affecting the microneme**  
856 **steady abundance, intracellular trafficking, and intramembrane cleavage on the parasite surface.**

857 **A)** The steady level of micronemal proteins was not altered in the  $\Delta crt$  parasites. Freshly lysed parasites  
858 were filter-purified, lysed, and subjected to SDS-PAGE electrophoresis and immunoblotting. The blots  
859 were probed with anti-TgMIC2, TgM2AP, and TgMIC5 antibodies, along with anti-TgActin as the loading  
860 control. Individual micronemal proteins were normalized against the corresponding TgActin to quantify their  
861 steady state expression. **B)**  $\Delta crt$  parasites secreted less micronemal proteins than WT and  $\Delta crt CRT$   
862 parasites, and altered the micronemal secretion patterns. Freshly filter-purified parasites were incubated  
863 in medium at 37°C for 30 min to make constitutive ESAs, or were treated with 1% (v/v) ethanol in medium  
864 to produce induced ESAs. The ESA fractions were separated and probed with anti-TgMIC2, TgM2AP, and  
865 TgMIC5 antibodies for quantification of the secreted forms of these micronemal proteins. The ESA fractions  
866 were also probed with anti-TgGRA7 antibody, a dense granule protein, as the loading control. Statistical  
867 significance was determined using unpaired Student's *t*-test. **C)** Pulse invaded and replicated parasites

868 were stained with anti-TgMIC2 and anti-TgM2AP antibodies to examine their intracellular trafficking. No  
869 defects were detected in their intracellular trafficking. **D)** Pulse invaded and replicated parasites were also  
870 stained with anti-TgROP7 to examine the morphology of the rhoptry and intracellular trafficking of TgROP7.  
871 The rhoptry kept similar morphology and trafficking patterns among WT,  $\Delta crt$ , and  $\Delta crt CRT$  strains. The  
872 scale bars in the images of pulse invaded and extracellular parasites are 2  $\mu$ m, and the scale bar in the  
873 images of replicated parasites is 5  $\mu$ m. \*,  $p < 0.05$ ; \*\*,  $p < 0.01$ ; \*\*\*,  $p < 0.001$ ; \*\*\*\*,  $p < 0.0001$ ; n.s., not  
874 significant.

875

876 **Figure 4. The transcript and protein levels of a subtilisin-related protease, TgSUB1, were reduced**  
877 **in  $\Delta crt$  parasites. A)** The abundance of secreted TgSUB1 in the constitutive and induced ESAs was  
878 measured by immunoblotting. There was no detectable TgSUB1 in the constitutive and induced ESAs  
879 secreted by  $\Delta crt$  parasites via immunoblotting. **B)** The abundance of plasma membrane-anchored TgSUB1  
880 was measured by probing non-permeabilized parasites with antibodies recognizing TgSUB1. The  $\Delta crt$   
881 mutant significantly reduced TgSUB1 on its plasma membrane. **C)** TgSUB1 is a micronemal protein.  
882 TgSUB1 and TgMIC5 were both found to localize in the microneme of pulse invaded and replicated WT  
883 and  $\Delta crt CRT$  parasites. However, TgSUB1 signal was not detected in the  $\Delta crt$  parasites. **D)** The cell lysates  
884 of the  $\Delta crt$  parasites showed that the steady level of TgSUB1 was reduced by ~90% in the  $\Delta crt$  strain. **E)**  
885 The transcript level of TgSUB1 was quantified by quantitative PCR. It was also decreased by approximately  
886 90% in the  $\Delta crt$  mutant. All assays listed in this figure were replicated at least in triplicate. Statistical  
887 significance was calculated using unpaired Student's *t*-test: \*\*\*,  $p < 0.001$ ; \*\*\*\*,  $p < 0.0001$ ; n.s., not  
888 significant.

889

890 **Figure 5. The transcript and protein abundances of several VAC-residing proteases were decreased**  
891 **in  $\Delta crt$ .**

892 **A)** RNA-Seq was performed in WT and  $\Delta crt$  parasites. Each sample was sequenced in duplicate for  
893 statistical comparison. A volcano plot was used to summarize genes that altered their transcription greater  
894 than 1.5-fold with statistical significance less than 0.05 in the  $\Delta crt$  mutant relative to the WT strain. Forty-

895 six and fifty-six genes labeled in the blue and red dots became up- and down-regulated in the  $\Delta crt$  mutant,  
896 respectively. The blue and red dash lines represented the borderline of 1.5-fold change in gene transcripts,  
897 and the genes above the black dash line showed their  $p$  values of statistical significance below 0.05. **B)**  
898 qPCR was used to validate 4 down-regulated proteases that were identified by RNA-Seq analysis, along  
899 with two known VAC proteases, TgCPL and TgCPB. *TgAMN*, *TgSCP*, *TgASP1*, and *TgCPB* displayed  
900 down-regulated transcription in  $\Delta crt$  parasites compared to WT. **C)** The steady protein abundances of  
901 TgCPL and TgCPB were quantified in the lysates of parasites by immunoblotting. The protein levels of  
902 TgCPL and TgCPB in  $\Delta crt$  mutant were reduced by ~25% and 60%, respectively, compared to the WT  
903 parasites. **D)** TgSCP and TgAMN were endogenously tagged with 3xmyc and 3xHA, respectively, at their  
904 C-termini. The expression of the epitope-tagged proteins was confirmed by immunoblotting. The parasites  
905 were co-stained with antibodies recognizing their respective epitope tags as well as the VAC and ELC  
906 markers. Both TgSCP and TgAMN were localized in the VAC and ELC by immunofluorescence. Statistical  
907 significance was performed using unpaired Student's  $t$ -test. \*,  $p < 0.05$ ; \*\*,  $p < 0.01$ ; n.s., not significant.

908

909 **Figure 6. Suppression of proteolysis in the VAC reduced VAC size and partially restored integrity**  
910 **of parasite's endolysosomal system, which recovered TgSUB1 expression, micronemal protein**  
911 **trimming in ESAs, and parasite invasion. A)** The  $\Delta crt$  parasites were incubated with 1  $\mu$ M LHVS, an  
912 irreversible inhibitor of TgCPL, for one lytic cycle, followed by a pulse invasion. Parasites were stained with  
913 anti-TgCPL antibodies to determine the size of the VAC. The swollen VAC phenotype was significantly  
914 reduced in the LHVS-treated parasites. Scale bar = 2 $\mu$ m. **B)** TgCPB, a VAC-residing endo- and exo-  
915 peptidase was genetically deleted in the  $\Delta crt$  strain. Schematic illustration for the creation of the  $\Delta crt\Delta cpb$   
916 mutant. A PCR product carrying a pyrimethamine resistance cassette (DHFR) flanked by 50 bps of the 5'-  
917 and 3'-untranscribed regions of *TgCPB* was transfected into WT parasites for double crossover  
918 replacement of *TgCPB*. Primers indicated in panel B were used to verify the replacement of *TgCPB* with  
919 *DHFR* via PCR and agarose gel electrophoresis. The ablation of *TgCPB* in  $\Delta crt\Delta cpb$  parasites was also  
920 confirmed by immunoblotting. **C)** The sizes of the VAC in WT,  $\Delta crt$ , and  $\Delta crt\Delta cpb$  parasites were  
921 determined by the methods mentioned above. The  $\Delta crt\Delta cpb$  parasites displayed a partial reduction in the

922 size of the VAC compared to WT parasites. **D)** The pulse invaded parasites showing co-localization  
923 between the VAC (TgCPL) and ELC (proTgM2AP) in WT,  $\Delta crt$ ,  $\Delta crtCRT$ , and  $\Delta crt\Delta cpb$  strains were  
924 quantified. At least 100 parasites were quantified for each replicate in a total of three replicates. The  
925  $\Delta crt\Delta cpb$  parasites had a significantly lower percentage of parasites having arrested co-localization  
926 between the VAC and ELC compared to the  $\Delta crt$  mutant. **E)** The lysates of WT,  $\Delta crt$ , and  $\Delta crt\Delta cpb$   
927 parasites were probed with antibodies recognizing TgSUB1. The steady expression of TgSUB1 was  
928 restored in  $\Delta crt\Delta cpb$  parasites. **F)** The constitutive and induced ESAs of WT,  $\Delta crt$ , and  $\Delta crt\Delta cpb$  strains  
929 were made and probed with the antibodies indicated in the figure. The secretion and trimming of  
930 micronemal proteins were also recovered in the  $\Delta crt\Delta cpb$  mutant. **G)** The invasion efficiency of WT,  $\Delta crt$ ,  
931 and  $\Delta crt\Delta cpb$  strains was determined using the procedures mentioned above. The  $\Delta crt\Delta cpb$  parasites  
932 showed increased invasion efficiency compared to the  $\Delta crt$  strain, albeit still a lower efficiency than that of  
933 WT parasites. Scale bar = 2  $\mu$ m. Statistical significance was calculated using unpaired Student's *t*-test. \*,  
934  $p < 0.05$ ; \*\*,  $p < 0.01$ ; \*\*\*,  $p < 0.001$ ; n.s., not significant.

935 **Figure 7. TgCRT is a functional transporter and its transport efficiency is correlated with VAC size**  
936 **in the parasites. A)** CQ transport by PfCRT and TgCRT (PMA-TgCRT) expressed in *S. cerevisiae*.  
937 Transport was extrapolated from CQ-induced growth delays as described in [32,33]. Results are the  
938 average of at least four independent experiments  $\pm$  SEM. EV, empty vector; PfCRT-HB3, wild type PfCRT;  
939 PMA-TgCRT, plasma membrane ATPase-TgCRT fusion (see Fig S4); PMA-TgCRT<sup>T369K</sup>, TgCRT fusion  
940 protein harboring T to K substitution at the position analogous to residue 76 in PfCRT (see text). **B)** A  
941 mutation of T369K was introduced into WT TgCRT complementation construct by site-directed  
942 mutagenesis before it was electroporated into the  $\Delta crt$  mutant. The VAC sizes were determined based on  
943 TgCPL staining using the methods mentioned above. The  $\Delta crt$  mutant complemented with TgCRT<sup>T369K</sup>  
944 partially restored its VAC size, but it was still significantly bigger than that transfected with WT TgCRT.  
945 Statistical significance was calculated using unpaired Student's *t*-test. \*,  $p < 0.05$ ; \*\*,  $p < 0.01$ .

946

947 **Figure 8. A model for the regulation of the endolysosomal system in *Toxoplasma* parasites.** The  
948 *Toxoplasma* parasite contains a separate endosome-like compartment from the digestive vacuole within



949 its endolysosomal system. When the parasite lacks TgCRT, the VAC gets swollen and cannot separate  
950 from its adjacent ELC. This aberrant co-localization leads to reduced transcript and protein abundances of  
951 several proteases residing within the endolysosomal system, including TgSUB1. These changes alter the  
952 secretion of micronemal proteins, thereby resulting in invasion defects in the TgCRT-null mutant. ELC,  
953 endosome-like compartment; ER, endoplasmic reticulum; Go, Golgi apparatus; Mi, microneme; N,  
954 nucleus; Rh, rhoptry; TgCRT, *Toxoplasma* chloroquine resistance transporter ortholog; TgSUB1,  
955 *Toxoplasma* subtilisin 1; VAC, vacuolar compartment.

956

957 **Table 1. Strains used in this study.**

958

959 **Figure S1. No defects in intramembrane proteolytic cleavage of micronemal protein were observed**  
960 **in the  $\Delta crt$  mutant.** Purified, extracellular parasites that had not been permeabilized were stained with  
961 anti-TgMIC2 and anti-TgSAG1 antibodies in order to measure the retention of TgMIC2 on the parasite  
962 surface. During secretion, the TgMIC2 protein is cleaved by intramembrane rhomboid proteases, such as  
963 TgROM4. The abundance of TgMIC2 on the surface of  $\Delta crt$  parasites was similar to that of the WT and  
964  $\Delta crt CRT$  strains, indicating that there is comparable intramembrane cleavage of TgMIC2 among the  
965 parasites with or without TgCRT.

966 **Figure S2. Schematic of the endogenous epitope-tagging of *Toxoplasma* putative aminopeptidase**  
967 **N (TgAMN, TGGT1\_221310) and putative Pro-Xaa serine carboxypeptidase (TgSCP,**  
968 **TGGT1\_254010). A)** The plasmid encoding Cas9 and sgRNA targeting TgAMN was co-transfected into  
969 WT parasites with the PCR product carrying a 3xHA epitope tag and a pyrimethamine resistance cassette  
970 (DHFR) flanked by 50 bp regions upstream and downstream of the stop codon of TgAMN. The 3xHA tag  
971 and the drug resistance cassette were incorporated at the C-terminus of the *Toxoplasma* putative  
972 aminopeptidase N via double crossover homologous recombination mediated by the CRISPR-Cas9  
973 genome editing tool. **B)** The putative Pro-Xaa serine carboxypeptidase was endogenously tagged with a  
974 3xmyc epitope tag at its C-terminus by single crossover homologous recombination. A 1 kb region  
975 upstream of the stop codon of TgSCP was amplified and fused at the 5'-end of the 3xmyc tag to produce



976 the TgSCP-3xmyc tagged plasmid. The 1 kb TgSCP-coding region was cleaved by an endonuclease in  
977 the middle prior to transfection to facilitate its integration.

978

979 **Figure S3. The subcellular concave structure in the  $\Delta crt\Delta cpb$  mutant was shrunken relative to the**  
980  **$\Delta crt$  strain during the extracellular stage.** WT,  $\Delta crt$ ,  $\Delta crtCRT$ , and  $\Delta crt\Delta cpb$  parasites were purified and  
981 attached on the surface of a slide for differential interference contrast (DIC) microscopy imaging. Although  
982 the  $\Delta crt\Delta cpb$  mutant still showed an enlarged concave subcellular structure (indicated by the arrow), their  
983 sizes were significantly smaller than those in the  $\Delta crt$  mutant. Scale bar = 5  $\mu$ m.

984 **Figure S4. Alignment of TgCRT and PfCRT primary sequences and schematic of the PMA-TgCRT**  
985 **construct expressed in *S. cerevisiae*.** **A)** Alignment of TgCRT and PfCRT amino acid sequences reveals  
986 the 300 most N-terminal residues to be non-homologous, and that they do not encode any putative  
987 transmembraneous domains or inter helical loop regions, whereas the remainder of TgCRT is highly  
988 homologous to PfCRT. Alignment analysis also revealed that the threonine residue at position 369 within  
989 TgCRT corresponds to the well-characterized lysine residue at position 76 within PfCRT (highlighted in  
990 red box). Identical and similar residues are highlighted in black and dark grey, respectively. **B)** The 111  
991 most N-terminal residues of *S. cerevisiae* plasma membrane ATPase (PMA; black) are fused in frame to  
992 the truncated TgCRT (dark grey) from which the first 300 codons have been deleted. The construct  
993 includes a C-terminal tag comprised of hexaHIS (H), biotin acceptor domain (B), and V5 epitope tag (V;  
994 “HBV” light grey). **C)** Primary amino acid structure of PMA-TgCRT. Residues from PMA are shown in black,  
995 those from TgCRT are in shown dark grey, and those comprising the tag are shown in light grey.

996 **Figure S5. Anti-V5 Western blot analysis of TgCRT and PfCRT constructs expressed in *S.***  
997 ***cerevisiae*.** Each lane contains 40  $\mu$ g of protein. Lane 1, yeast membranes for yeast expressing empty  
998 vector (EV); lane 2, PfCRT membranes; lane 3, TgCRT membranes; lane 4, PMA-TgCRT fusion  
999 membranes; lane 5, blank; lane 6, cytosol from TgCRT yeast; lane 7, cytosol from PMA-TgCRT yeast. The  
000 unmodified TgCRT is not expressed in *S. cerevisiae* (lane 3), however, the PMA-TgCRT fusion construct  
001 is expressed to similar levels relative to PfCRT [20], and is membrane localized. Lower molecular mass

002 bands in lane 4 are proteolytic products, and can also be found in the cytosolic fraction (lane 7).

003 **Figure S6.  $\Delta crt$  parasites were more sensitive to the treatment of chloroquine than WT parasites.**

004 WT,  $\Delta crt$ , and  $\Delta crtCRT$  parasites expressing luciferase were used to infect host cells in the presence of  
005 100  $\mu$ M or 0  $\mu$ M chloroquine. The luciferase activity of each strain was measured at 2 and 26 hrs post-  
006 infection. The ratios of the luciferase activities determined at 26 hours over that at 2 hrs were plotted.  
007 Statistical significance was determined using unpaired Student's *t*-test. \*,  $p < 0.05$ ; n.s., not significant.

008 **Table S1. Differential gene expression analysis between WT and  $\Delta crt$  strains.** The genes whose  
009 fold changes were  $> 1.5$  and  $p$ -values were  $< 0.05$  were listed.

010

011 **Table S2. Primers used in this study.**

012

013

014

015

016 **References**

- 017 1. Laliberté J, Carruthers VB. Host cell manipulation by the human pathogen *Toxoplasma gondii*.  
018 Cell Mol Life Sci. 2008;65: 1900–1915. doi:10.1007/s00018-008-7556-x
- 019 2. Carruthers VB, Tomley FM. Microneme proteins in apicomplexans. Subcell Biochem. 2008;47:  
020 33–45.
- 021 3. Lagal V, Binder EM, Huynh M-H, Kafsack BFC, Harris PK, Diez R, et al. *Toxoplasma gondii*  
022 protease TgSUB1 is required for cell surface processing of micronemal adhesive complexes and  
023 efficient adhesion of tachyzoites. Cell Microbiol. 2010;12: 1792–1808. doi:10.1111/j.1462-  
024 5822.2010.01509.x
- 025 4. Parussini F, Coppens I, Shah PP, Diamond SL, Carruthers VB. Cathepsin L occupies a vacuolar  
026 compartment and is a protein maturase within the endo/exocytic system of *Toxoplasma gondii*.  
027 Mol Microbiol. 2010;76: 1340–1357. doi:10.1111/j.1365-2958.2010.07181.x
- 028 5. Dogga SK, Mukherjee B, Jacot D, Kockmann T, Molino L, Hammoudi P-M, et al. A druggable  
029 secretory protein maturase of *Toxoplasma* essential for invasion and egress. Elife. 2017;6: 223.  
030 doi:10.7554/eLife.27480
- 031 6. Buguliskis JS, Brossier F, Shuman J, Sibley LD. Rhomboid 4 (ROM4) affects the processing of  
032 surface adhesins and facilitates host cell invasion by *Toxoplasma gondii*. PLoS Pathog. 2010;6:  
033 e1000858. doi:10.1371/journal.ppat.1000858
- 034 7. Santos JM, Ferguson DJP, Blackman MJ, Soldati-Favre D. Intramembrane cleavage of AMA1  
035 triggers *Toxoplasma* to switch from an invasive to a replicative mode. Science. 2011;331: 473–  
036 477. doi:10.1126/science.1199284
- 037 8. Parussini F, Tang Q, Moin SM, Mital J, Urban S, Ward GE. Intramembrane proteolysis of  
038 *Toxoplasma* apical membrane antigen 1 facilitates host-cell invasion but is dispensable for  
039 replication. Proc Natl Acad Sci USA. 2012;109: 7463–7468. doi:10.1073/pnas.1114661109
- 040 9. Dou Z, Carruthers VB. Cathepsin proteases in *Toxoplasma gondii*. Adv Exp Med Biol. Boston, MA:  
041 Springer US; 2011;712: 49–61. doi:10.1007/978-1-4419-8414-2\_4

- 042 10. Dou Z, McGovern OL, Di Cristina M, Carruthers VB. *Toxoplasma gondii* ingests and digests host  
043 cytosolic proteins. MBio. 2014;5: e01188–14. doi:10.1128/mBio.01188-14
- 044 11. Miller SA, Binder EM, Blackman MJ, Carruthers VB, Kim K. A conserved subtilisin-like protein  
045 TgSUB1 in microneme organelles of *Toxoplasma gondii*. J Biol Chem. 2001;276: 45341–45348.  
046 doi:10.1074/jbc.M106665200
- 047 12. Di Cristina M, Dou Z, Lunghi M, Kannan G, Huynh M-H, McGovern OL, et al. *Toxoplasma*  
048 depends on lysosomal consumption of autophagosomes for persistent infection. Nat Microbiol.  
049 2017;2: 17096. doi:10.1038/nmicrobiol.2017.96
- 050 13. Dou Z, Coppens I, Carruthers VB. Non-canonical maturation of two papain-family proteases in  
051 *Toxoplasma gondii*. J Biol Chem. 2013;288: 3523–3534. doi:10.1074/jbc.M112.443697
- 052 14. Warring SD, Dou Z, Carruthers VB, McFadden GI, van Dooren GG. Characterization of the  
053 chloroquine resistance transporter homologue in *Toxoplasma gondii*. Euk Cell. 2014;13: 1360–  
054 1370. doi:10.1128/EC.00027-14
- 055 15. Liu J, Pace D, Dou Z, King TP, Guidot D, Li Z-H, et al. A vacuolar-H<sup>+</sup>-pyrophosphatase (TgVP1) is  
056 required for microneme secretion, host cell invasion, and extracellular survival of *Toxoplasma*  
057 *gondii*. Mol Microbiol. 2014;93: 698–712. doi:10.1111/mmi.12685
- 058 16. Gligorijevic B, Bennett T, McAllister R, Urbach JS, Roepe PD. Spinning disk confocal microscopy  
059 of live, intraerythrocytic malarial parasites. 2. Altered vacuolar volume regulation in drug resistant  
060 malaria. Biochemistry. 2006;45: 12411–12423. doi:10.1021/bi0610348
- 061 17. Lee AH, Dhingra SK, Lewis IA, Singh MK, Siriwardana A, Dalal S, et al. Evidence for Regulation of  
062 Hemoglobin Metabolism and Intracellular Ionic Flux by the *Plasmodium falciparum* Chloroquine  
063 Resistance Transporter. Sci Rep. 2018;8: 13578. doi:10.1038/s41598-018-31715-9
- 064 18. Paguio MF, Cabrera M, Roepe PD. Chloroquine transport in *Plasmodium falciparum*. 2. Analysis  
065 of PfCRT-mediated drug transport using proteoliposomes and a fluorescent chloroquine probe.  
066 Biochemistry. 2009;48: 9482–9491. doi:10.1021/bi901035j

- 067 19. Juge N, Moriyama S, Miyaji T, Kawakami M, Iwai H, Fukui T, et al. *Plasmodium falciparum*  
068 chloroquine resistance transporter is a H<sup>+</sup>-coupled polyspecific nutrient and drug exporter. Proc  
069 Natl Acad Sci USA. 2015;112: 3356–3361. doi:10.1073/pnas.1417102112
- 070 20. Callaghan PS, Hassett MR, Roepe PD. Functional Comparison of 45 Naturally Occurring Isoforms  
071 of the *Plasmodium falciparum* Chloroquine Resistance Transporter (PfCRT). Biochemistry.  
072 2015;54: 5083–5094. doi:10.1021/acs.biochem.5b00412
- 073 21. Waller KL, Muhle RA, Ursos LM, Horrocks P, Verdier-Pinard D, Sidhu ABS, et al. Chloroquine  
074 resistance modulated in vitro by expression levels of the *Plasmodium falciparum* chloroquine  
075 resistance transporter. J Biol Chem. 2003;278: 33593–33601. doi:10.1074/jbc.M302215200
- 076 22. Huynh M-H, Carruthers VB. Tagging of endogenous genes in a *Toxoplasma gondii* strain lacking  
077 Ku80. Euk Cell. 2009;8: 530–539. doi:10.1128/EC.00358-08
- 078 23. Larson ET, Parussini F, Huynh M-H, Giebel JD, Kelley AM, Zhang L, et al. *Toxoplasma gondii*  
079 cathepsin L is the primary target of the invasion-inhibitory compound morpholinurea-leucyl-  
080 homophenyl-vinyl sulfone phenyl. J Biol Chem. 2009;284: 26839–26850.  
081 doi:10.1074/jbc.M109.003780
- 082 24. McGovern OL, Rivera-Cuevas Y, Kannan G, Narwold AJ, Carruthers VB. Intersection of endocytic  
083 and exocytic systems in *Toxoplasma gondii*. Traffic. 2018;19: 336–353. doi:10.1111/tra.12556
- 084 25. Blader IJ, Coleman BI, Chen C-T, Gubbels M-J. Lytic Cycle of *Toxoplasma gondii*: 15 Years Later.  
085 Annu Rev Microbiol. 2015;69: 463–485. doi:10.1146/annurev-micro-091014-104100
- 086 26. Hager KM, Carruthers VB. MARveling at parasite invasion. Trends Parasitol. 2008;24: 51–54.  
087 doi:10.1016/j.pt.2007.10.008
- 088 27. Dubremetz J-F. Rhoptries are major players in *Toxoplasma gondii* invasion and host cell  
089 interaction. Cell Microbiol. 2007;9: 841–848. doi:10.1111/j.1462-5822.2007.00909.x
- 090 28. Shen B, Buguliskis JS, Lee TD, Sibley LD. Functional analysis of rhomboid proteases during  
091 *Toxoplasma* invasion. MBio. 2014;5: e01795–14. doi:10.1128/mBio.01795-14
- 092 29. Sloves P-J, Delhaye S, Mouveaux T, Werkmeister E, Slomianny C, Hovasse A, et al. *Toxoplasma*  
093 Sortilin-like Receptor Regulates Protein Transport and Is Essential for Apical Secretory Organelle

- 094 Biogenesis and Host Infection. *Cell Host Microbe*. 2012;11: 515–527.  
095 doi:10.1016/j.chom.2012.03.006
- 096 30. Saouros S, Dou Z, Marchant J, Carruthers VB, Matthews S. Microneme protein 5 regulates the  
097 activity of *Toxoplasma* subtilisin 1 by mimicking a subtilisin prodomain. *J Biol Chem*. 2012;287:  
098 36029–36040. doi:10.1074/jbc.M112.389825
- 099 31. Zhang H, Howard EM, Roepe PD. Analysis of the antimalarial drug resistance protein Pfcr  
100 expressed in yeast. *J Biol Chem*. 2002;277: 49767–49775. doi:10.1074/jbc.M204005200
- 101 32. Baro NK, Pooput C, Roepe PD. Analysis of chloroquine resistance transporter (CRT) isoforms and  
102 orthologues in *S. cerevisiae* yeast. *Biochemistry*. 2011;50: 6701–6710. doi:10.1021/bi200922g
- 103 33. Baro NK, Callaghan PS, Roepe PD. Function of resistance conferring *Plasmodium falciparum*  
104 chloroquine resistance transporter isoforms. *Biochemistry*. 2013;52: 4242–4249.  
105 doi:10.1021/bi400557x
- 106 34. Sidhu ABS, Verdier-Pinard D, Fidock DA. Chloroquine resistance in *Plasmodium falciparum*  
107 malaria parasites conferred by pfcr mutations. *Science*. 2002;298: 210–213.  
108 doi:10.1126/science.1074045
- 109 35. Martin RE, Marchetti RV, Cowan AI, Howitt SM, Bröer S, Kirk K. Chloroquine transport via the  
110 malaria parasite's chloroquine resistance transporter. *Science*. 2009;325: 1680–1682.  
111 doi:10.1126/science.1175667
- 112 36. Binder EM, Lagal V, Kim K. The Prodomain of *Toxoplasma gondii* GPI-Anchored Subtilase  
113 TgSUB1 Mediates its Targeting to Micronemes. *Traffic*. 2008;9: 1485–1496. doi:10.1111/j.1600-  
114 0854.2008.00774.x
- 115 37. Settembre C, Di Malta C, Polito VA, Garcia Arencibia M, Vetrini F, Erdin S, et al. TFEB links  
116 autophagy to lysosomal biogenesis. *Science*. 2011;332: 1429–1433.  
117 doi:10.1126/science.1204592
- 118 38. Fu M, Blakeshear PJ. RNA-binding proteins in immune regulation: a focus on CCCH zinc finger  
119 proteins. *Nat Rev Immunol*. 2017;17: 130–143. doi:10.1038/nri.2016.129

- 120 39. Carballo E, Lai WS, Blackshear PJ. Feedback Inhibition of Macrophage Tumor Necrosis Factor- $\alpha$   
121 Production by Tristetraprolin. *Science*. 1998;281: 1001–1005. doi:10.1126/science.281.5379.1001
- 122 40. Lewis IA, Wacker M, Olszewski KL, Cobbold SA, Baska KS, Tan A, et al. Metabolic QTL analysis  
123 links chloroquine resistance in *Plasmodium falciparum* to impaired hemoglobin catabolism.  
124 Neafsey DE, editor. *PLoS Genet*. 2014;10: e1004085. doi:10.1371/journal.pgen.1004085
- 125 41. Sijwali PS, Rosenthal PJ. Gene disruption confirms a critical role for the cysteine protease  
126 falcipain-2 in hemoglobin hydrolysis by *Plasmodium falciparum*. *Proc Natl Acad Sci USA*.  
127 2004;101: 4384–4389. doi:10.1073/pnas.0307720101
- 128 42. Miranda K, Pace DA, Cintron R, Rodrigues JCF, Fang J, Smith A, et al. Characterization of a  
129 novel organelle in *Toxoplasma gondii* with similar composition and function to the plant vacuole.  
130 *Mol Microbiol*. 2010;76: 1358–1375. doi:10.1111/j.1365-2958.2010.07165.x
- 131 43. Warmka J, Hanneman J, Lee J, Amin D, Ota I. Ptc1, a type 2C Ser/Thr phosphatase, inactivates  
132 the HOG pathway by dephosphorylating the mitogen-activated protein kinase Hog1. *Mol Cell Biol*.  
133 2001;21: 51–60. doi:10.1128/MCB.21.1.51-60.2001
- 134 44. Mapes J, Ota IM. Nbp2 targets the Ptc1-type 2C Ser/Thr phosphatase to the HOG MAPK  
135 pathway. *EMBO J*. 2004;23: 302–311. doi:10.1038/sj.emboj.7600036
- 136 45. González A, Ruiz A, Serrano R, Ariño J, Casamayor A. Transcriptional profiling of the protein  
137 phosphatase 2C family in yeast provides insights into the unique functional roles of Ptc1. *J Biol*  
138 *Chem*. 2006;281: 35057–35069. doi:10.1074/jbc.M607919200
- 139 46. Shen B, Brown KM, Lee TD, Sibley LD. Efficient Gene Disruption in Diverse Strains of  
140 *Toxoplasma gondii* Using CRISPR/CAS9. *MBio*. 2014;5: e01114–14. doi:10.1128/mBio.01114-14
- 141 47. Sidik SM, Hackett CG, Tran F, Westwood NJ, Lourido S. Efficient Genome Engineering of  
142 *Toxoplasma gondii* Using CRISPR/Cas9. Blader IJ, editor. *PLoS ONE*. 2014;9: e100450–8.  
143 doi:10.1371/journal.pone.0100450
- 144 48. Kaja S, Payne AJ, Singh T, Ghuman JK, Sieck EG, Koulen P. An optimized lactate  
145 dehydrogenase release assay for screening of drug candidates in neuroscience. *Journal of*  
146 *Pharmacol Toxicol Methods*. 2015;73: 1–6. doi:10.1016/j.vascn.2015.02.001



**A**

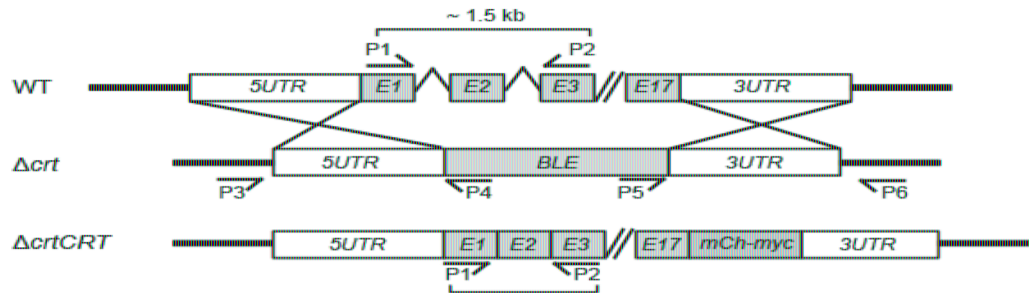

**B**

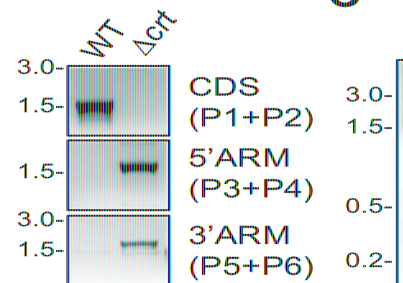

**C**

**D**

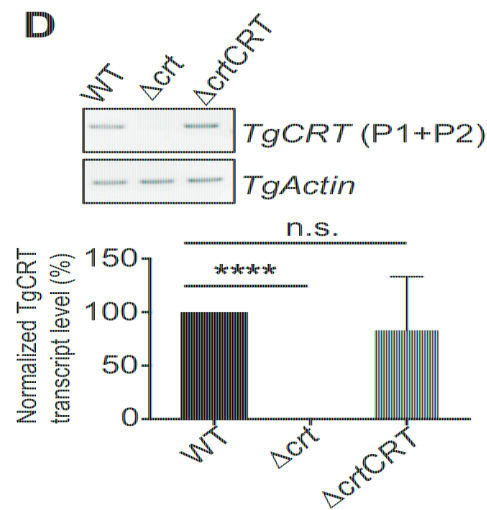

**E**

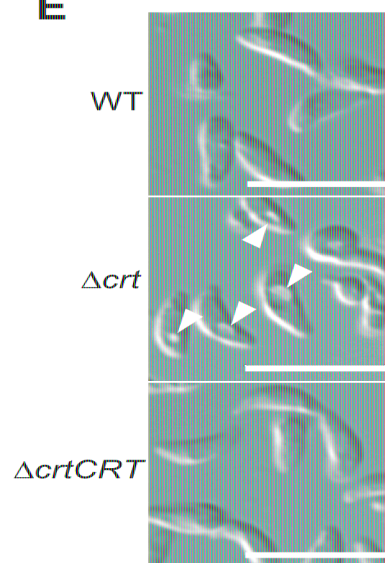

**F**

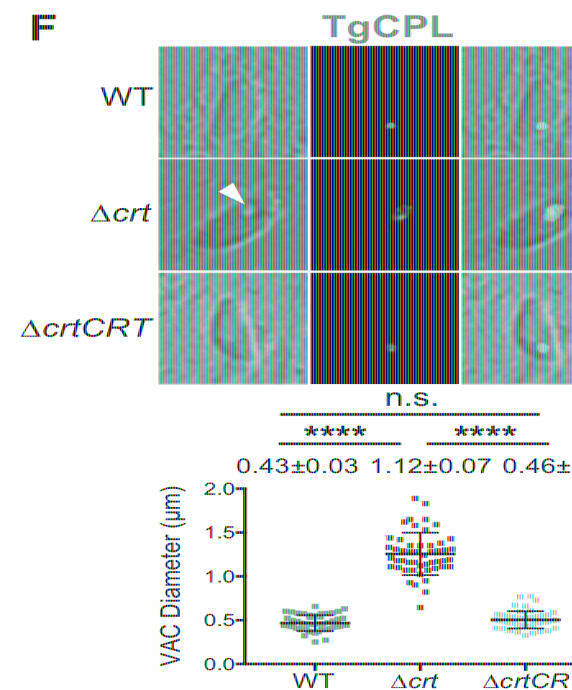

**G**

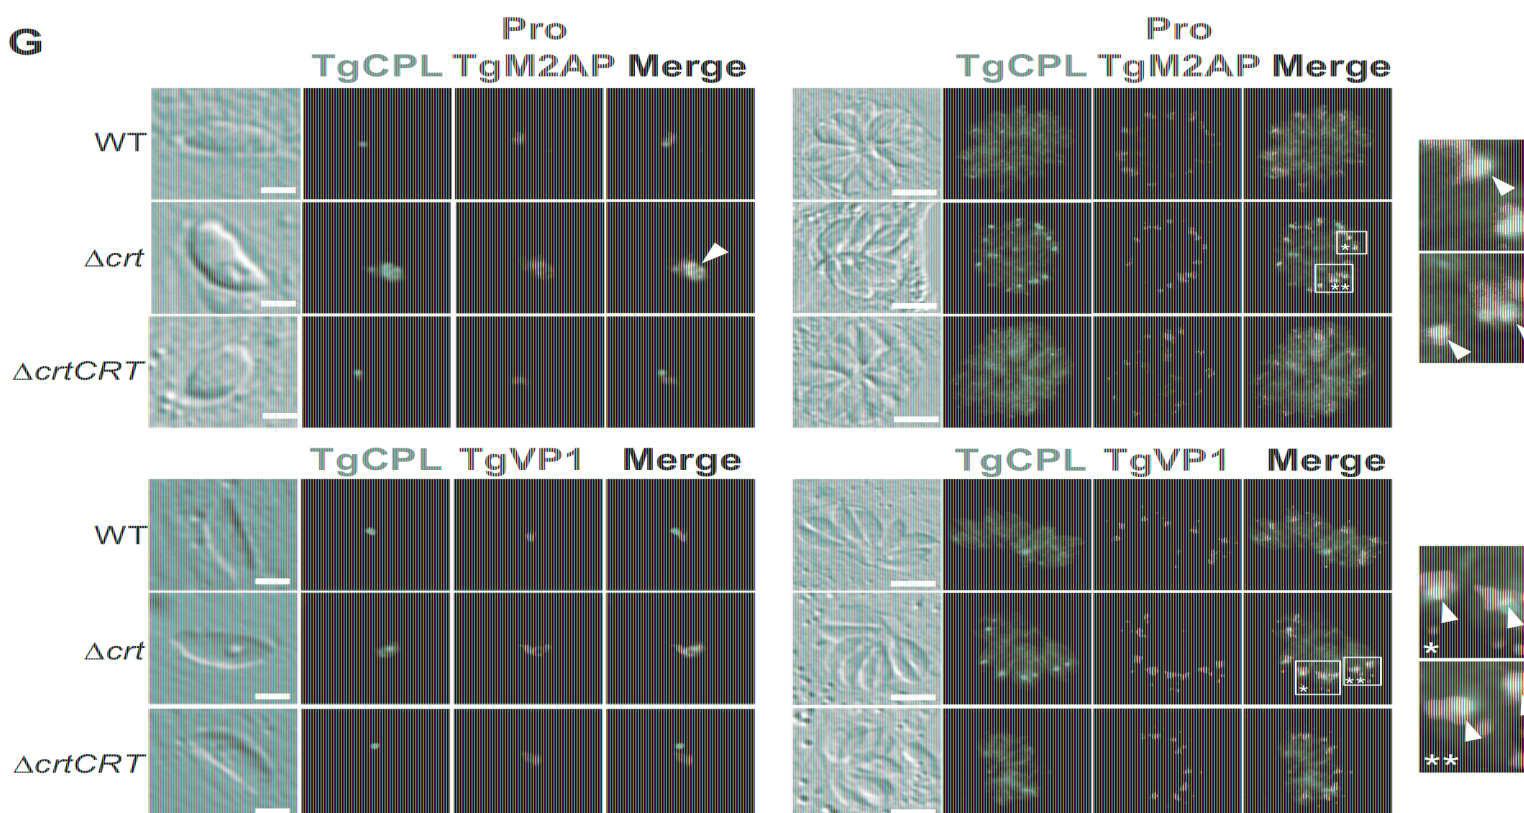

**Figure 1**

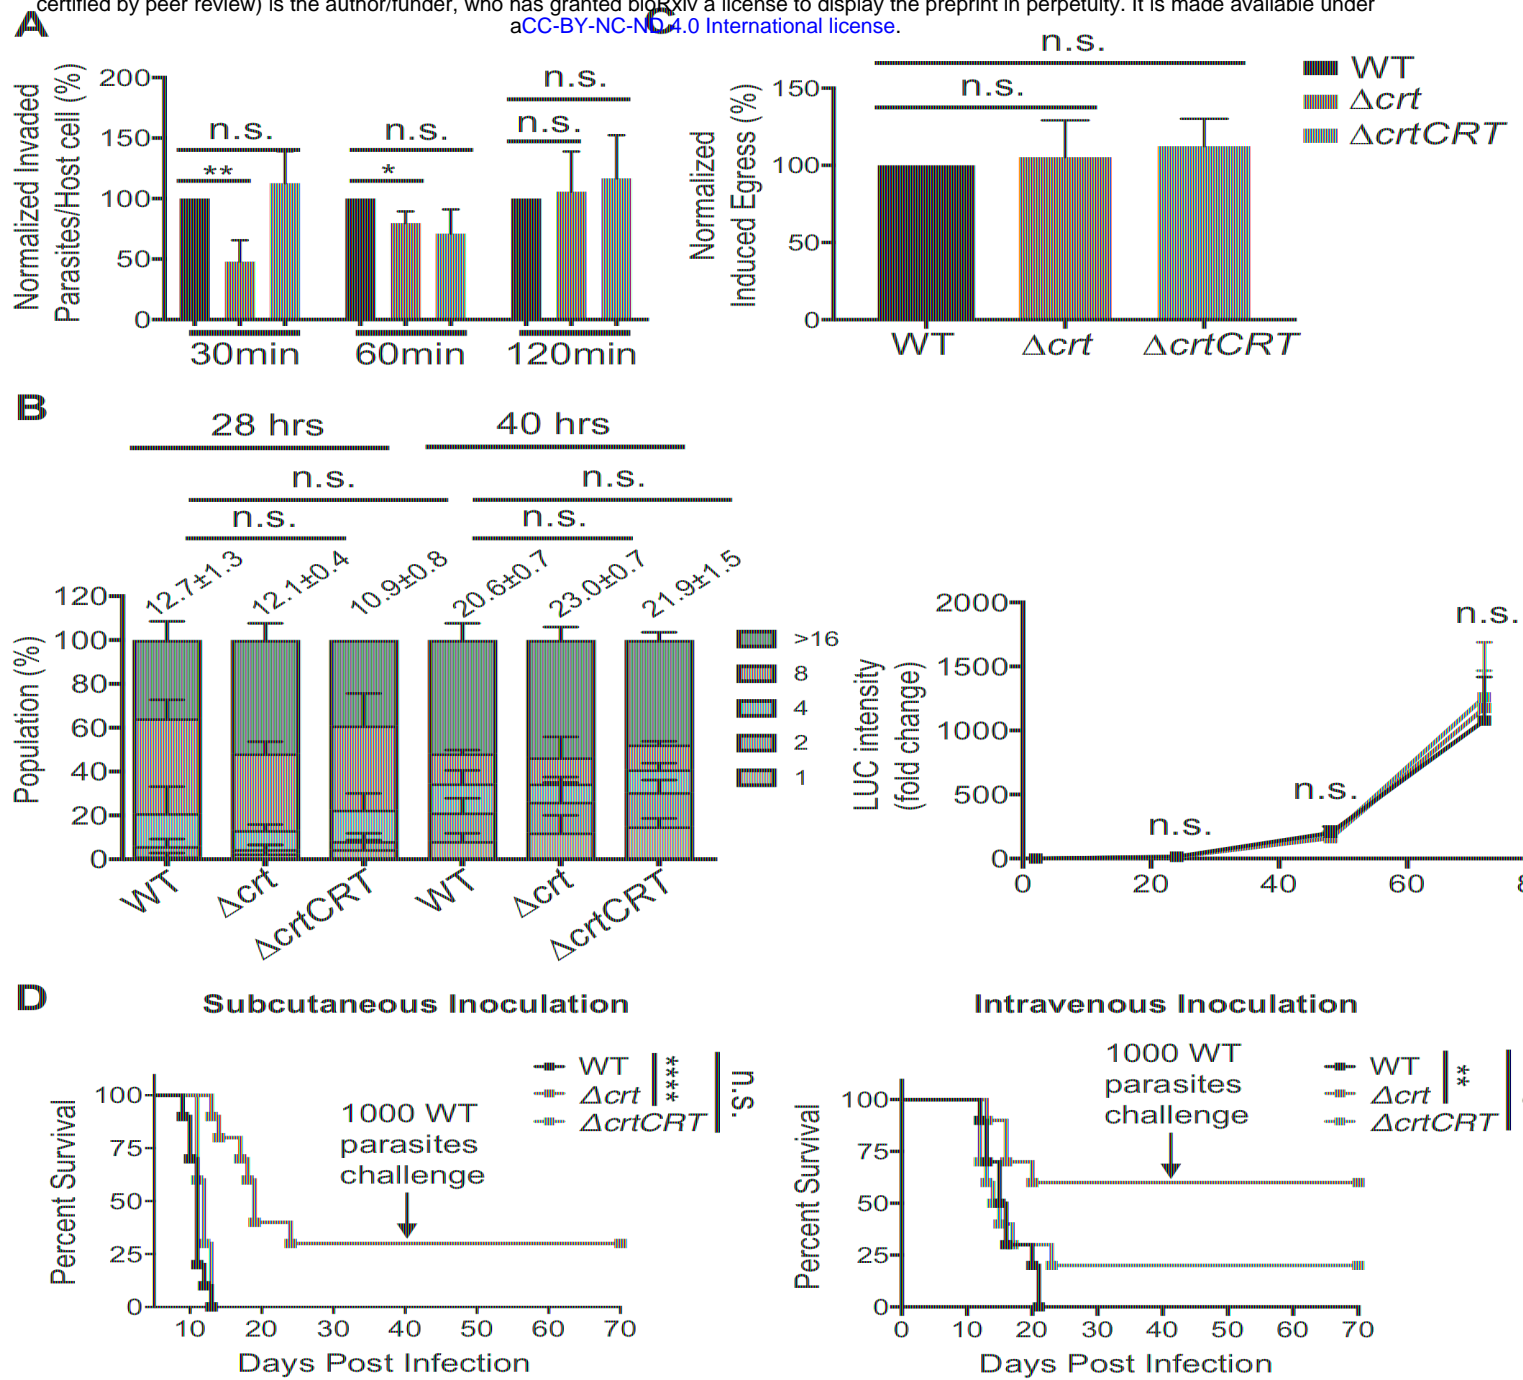

**Figure 2**

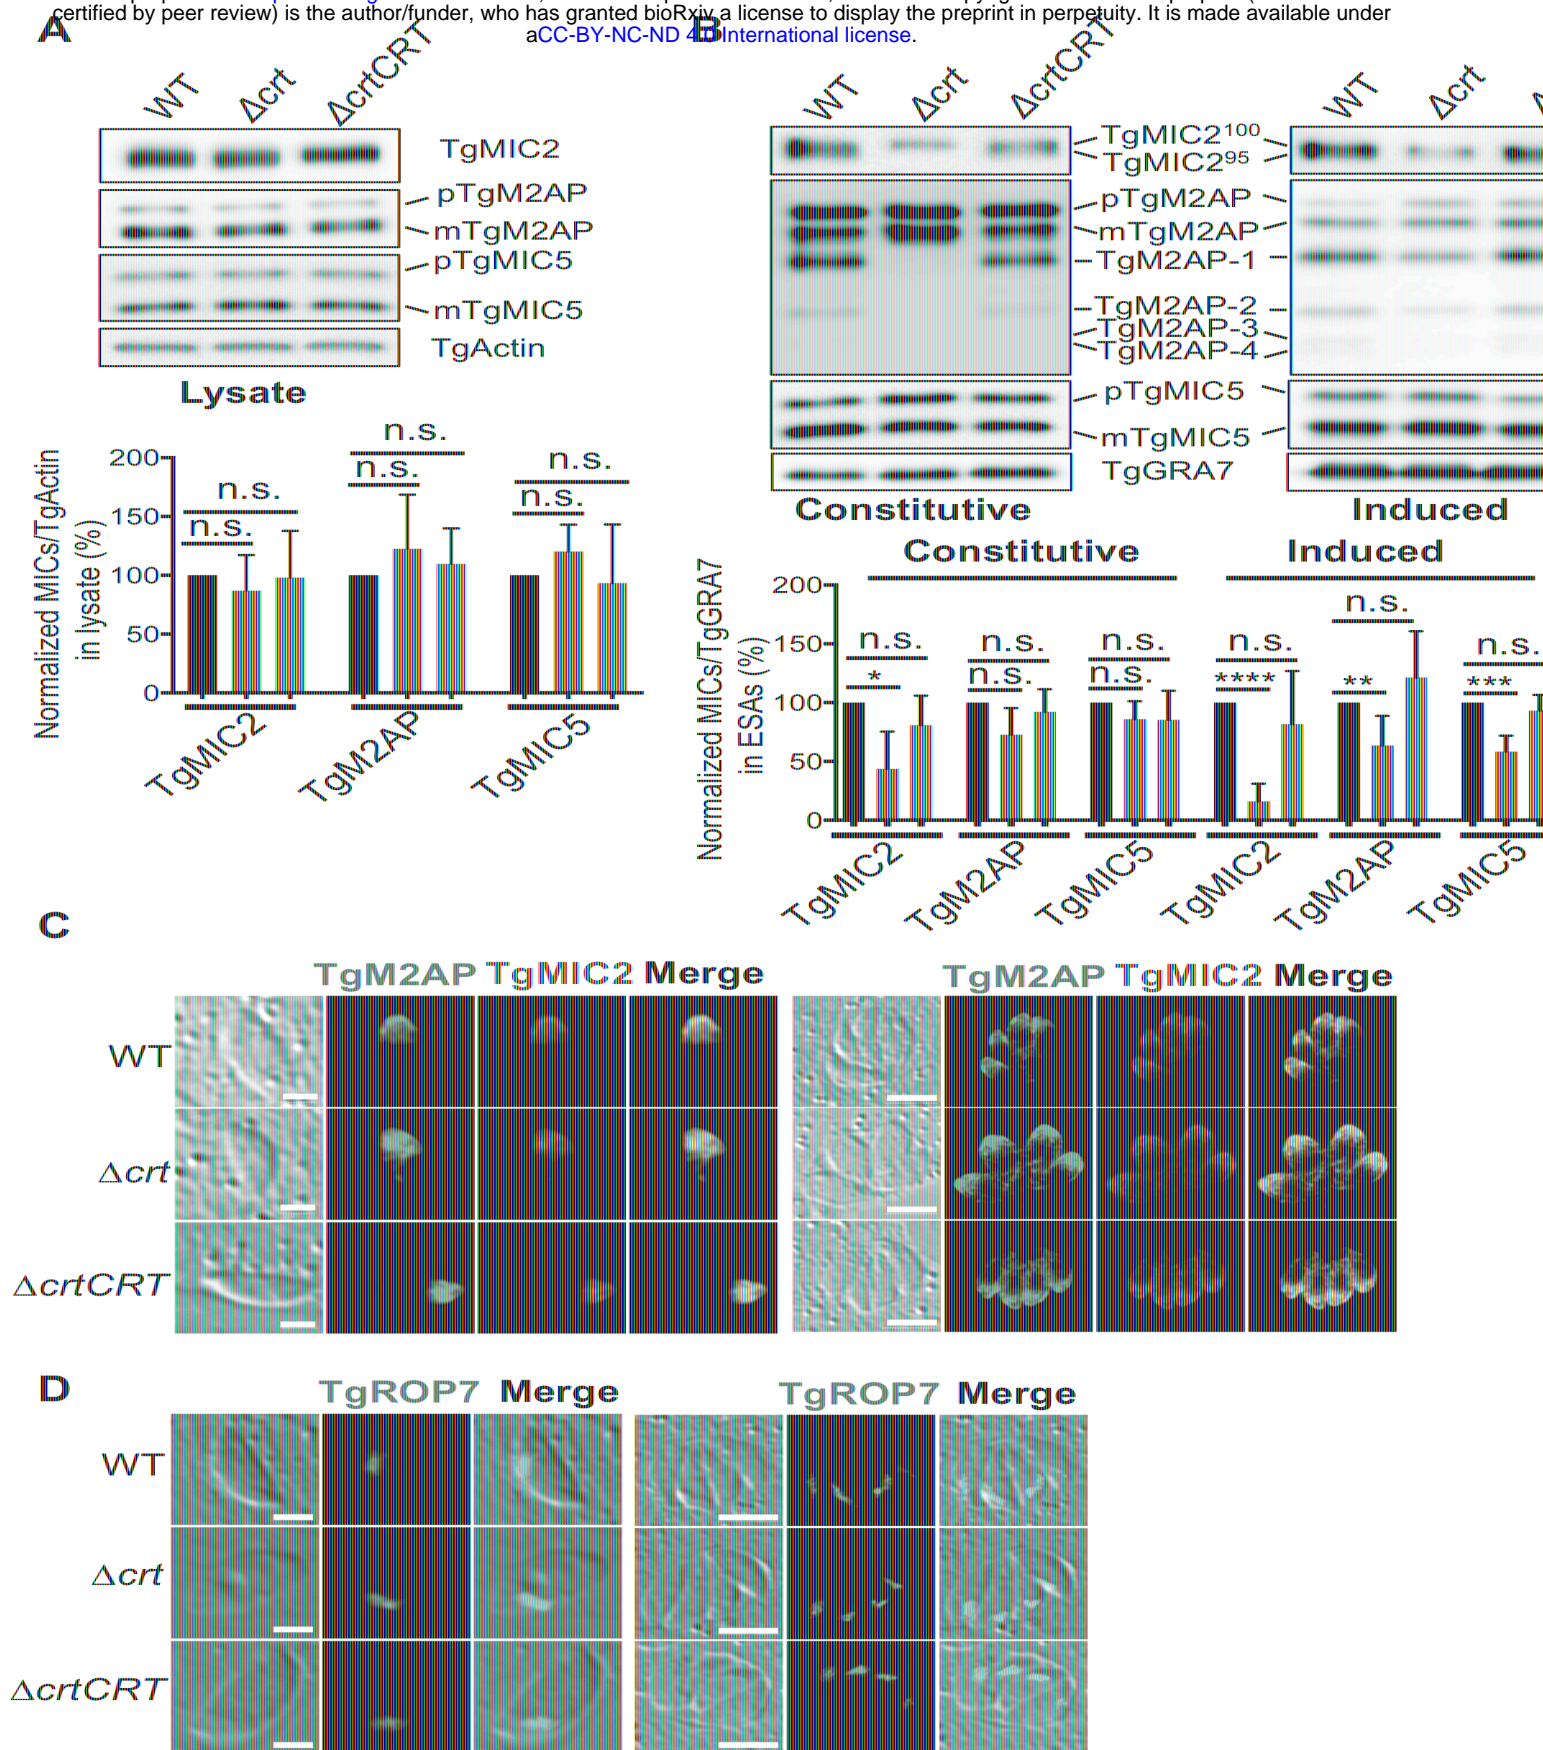

**Figure 3**

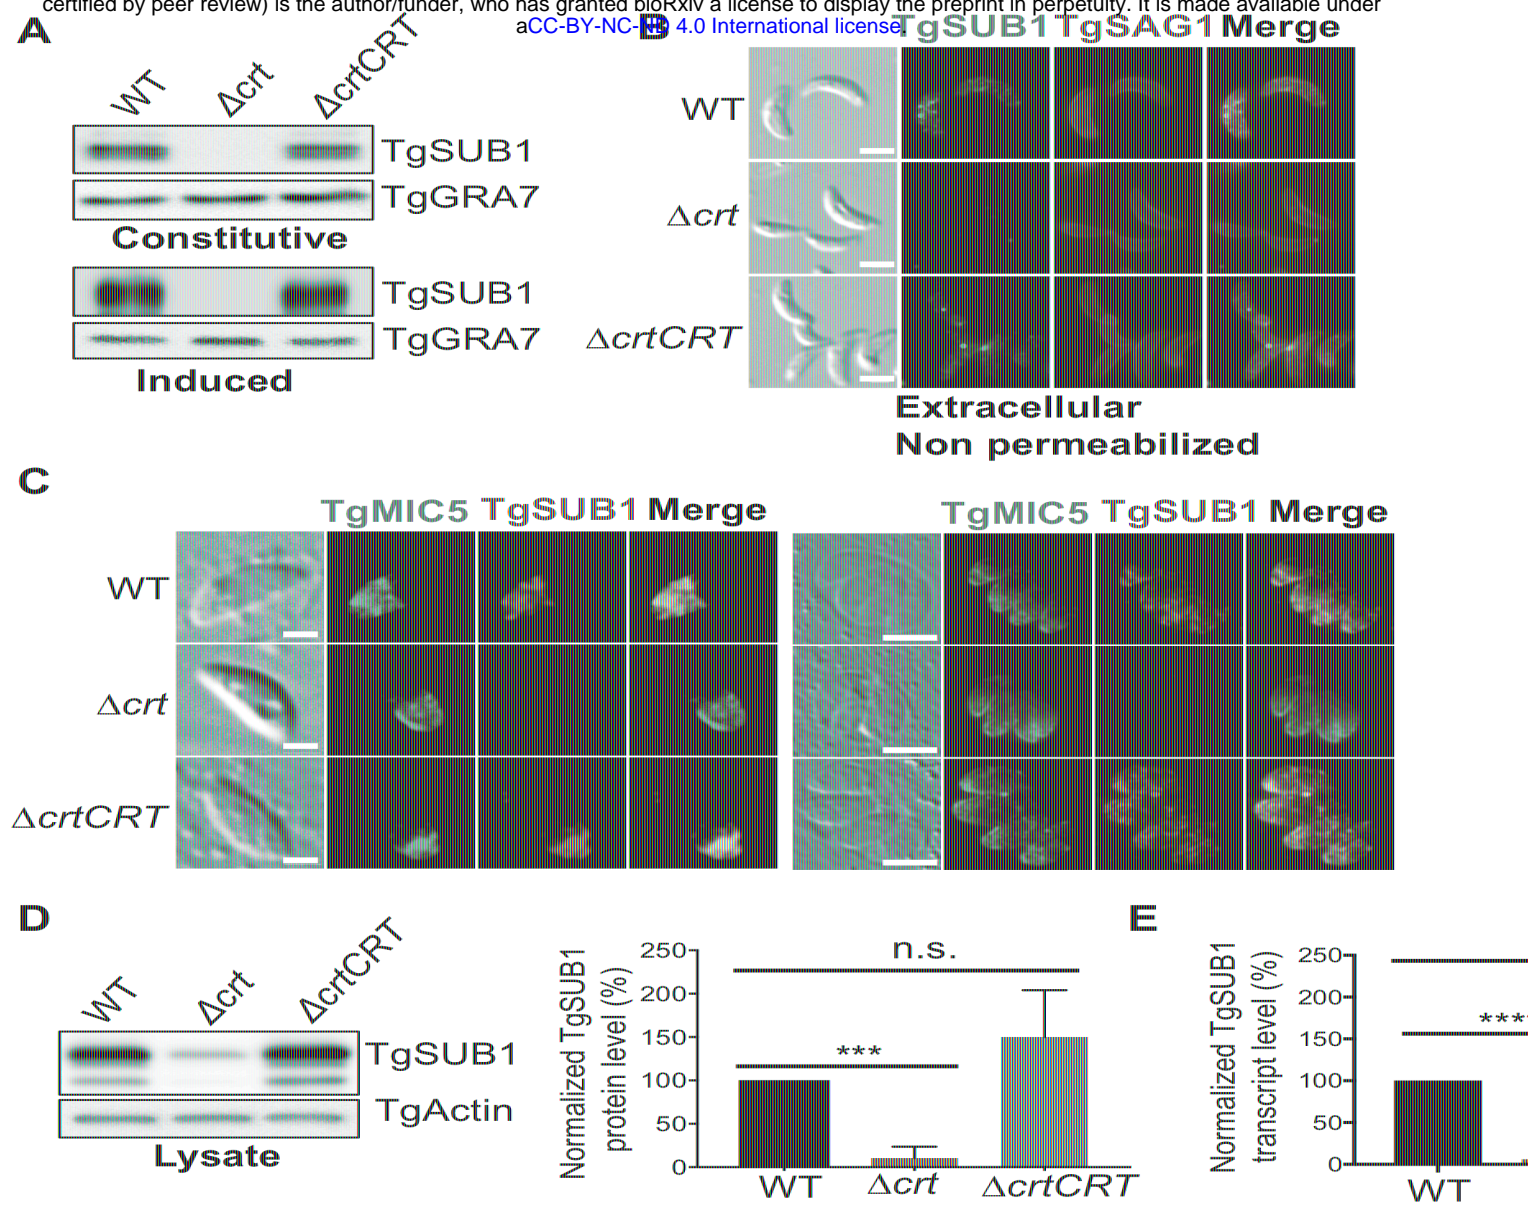

**Figure 4**



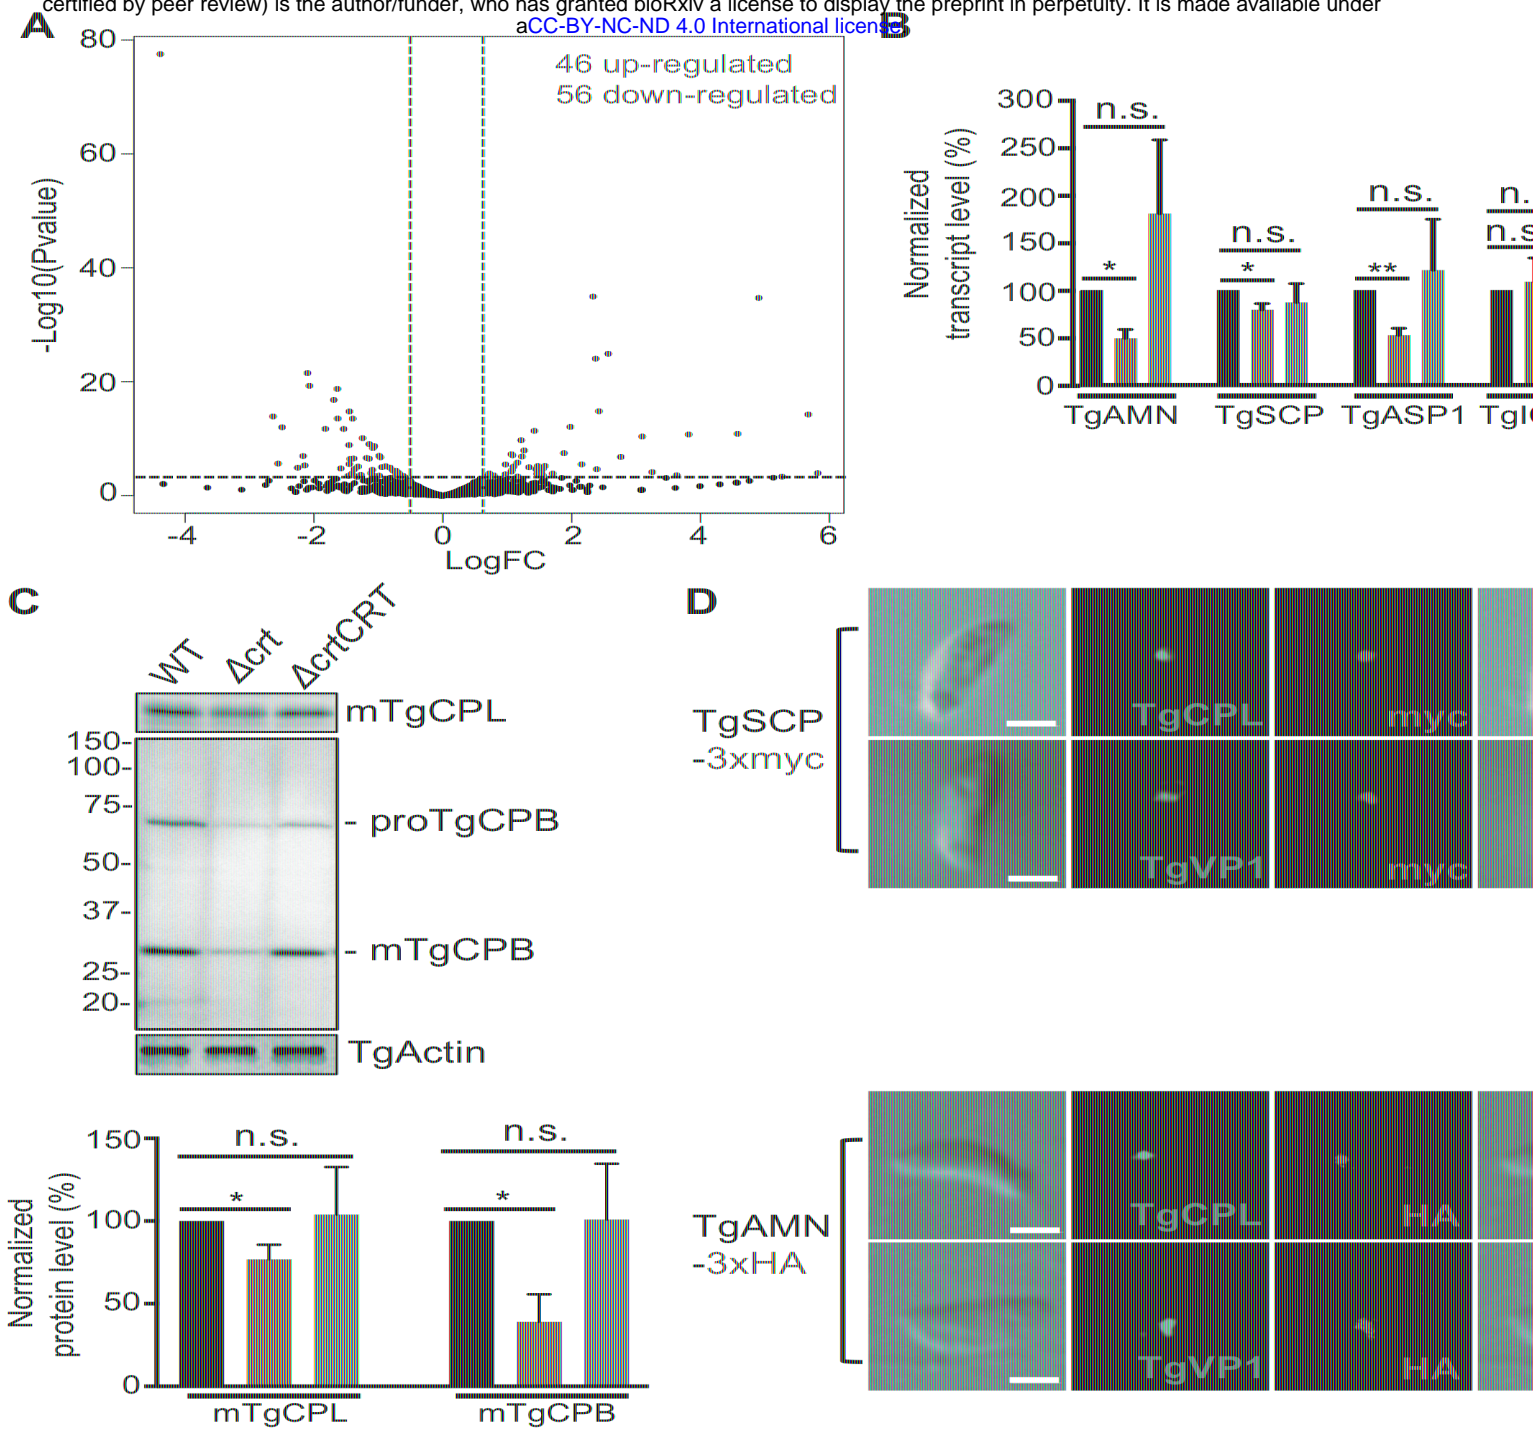

**Figure 5**

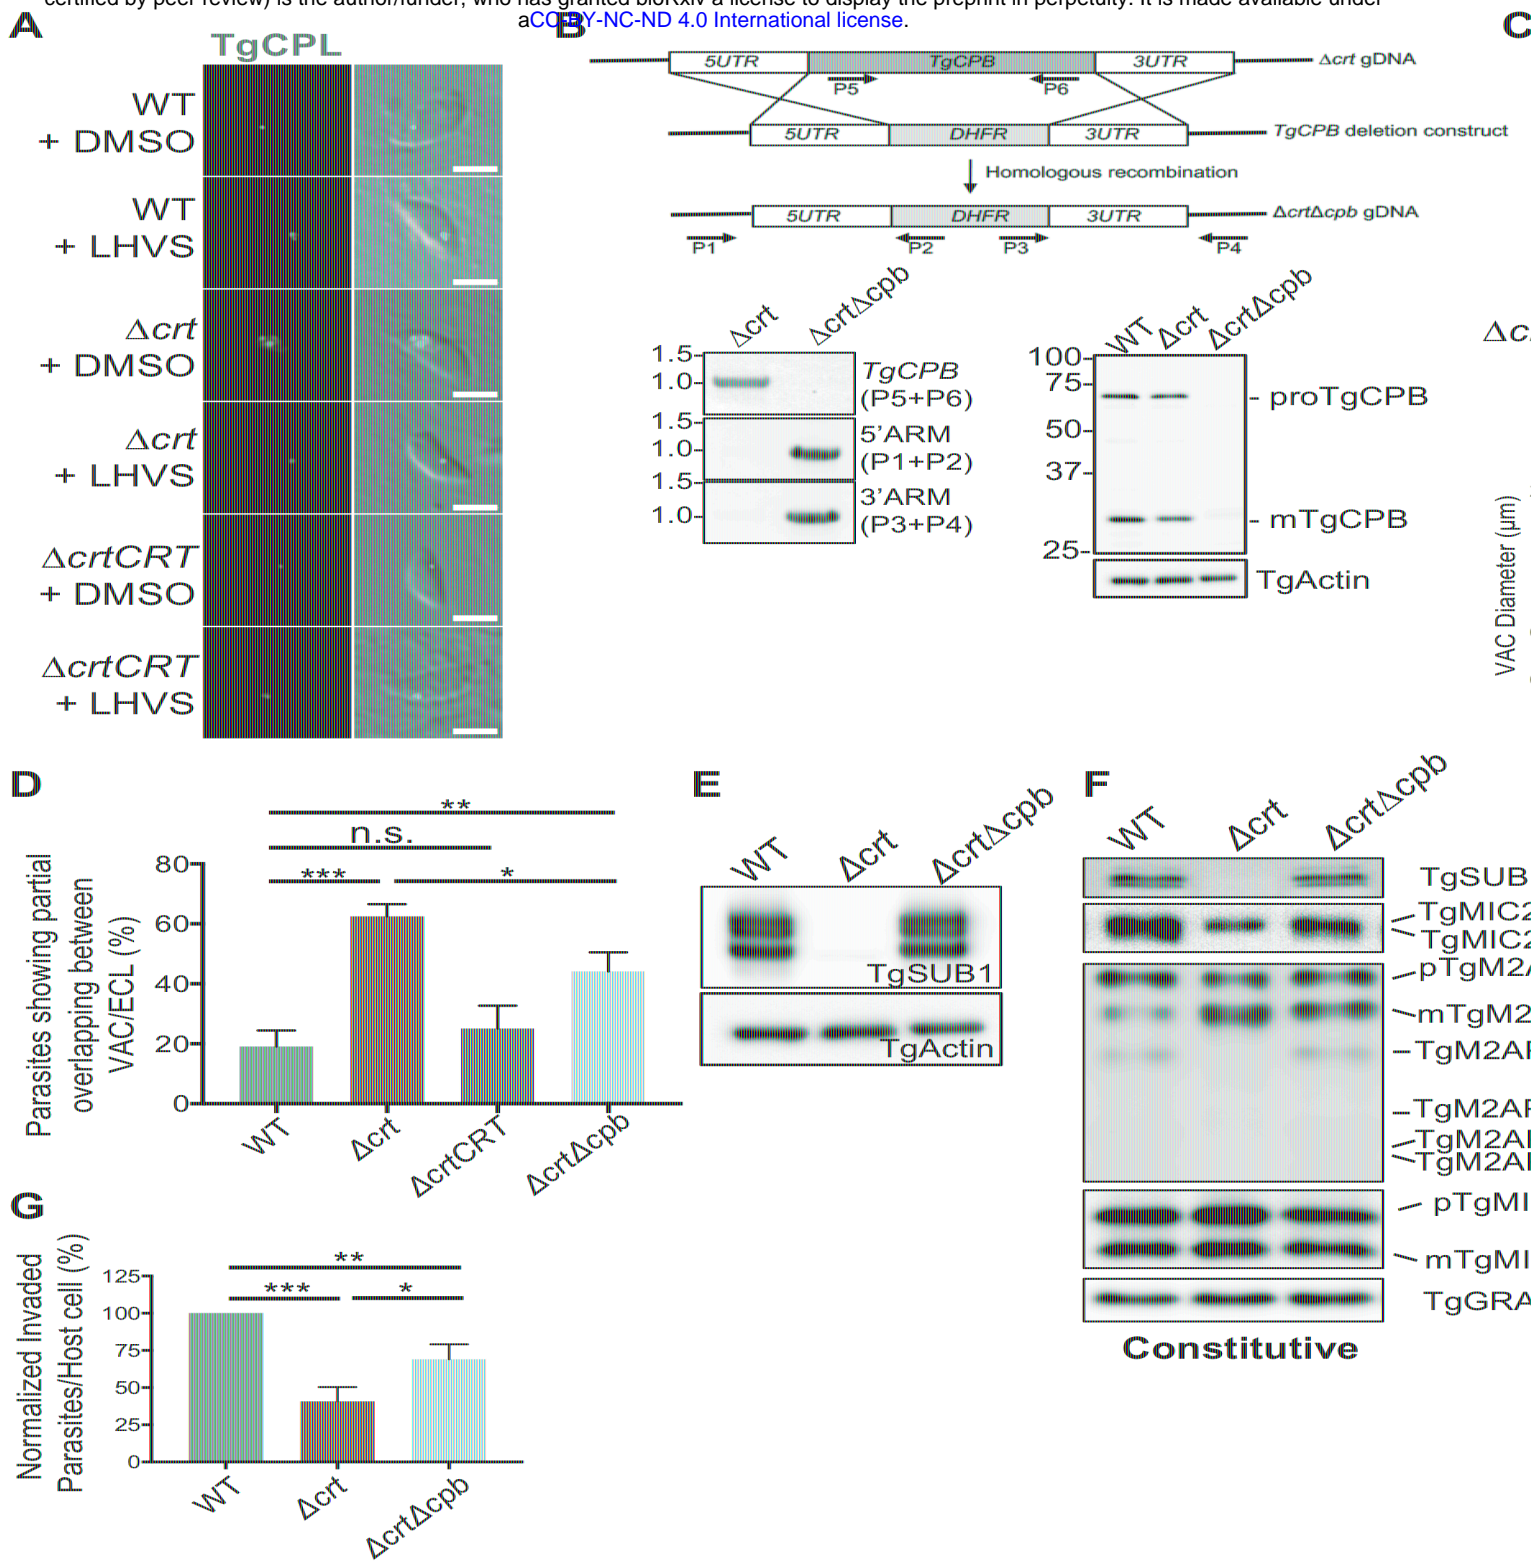

**A**

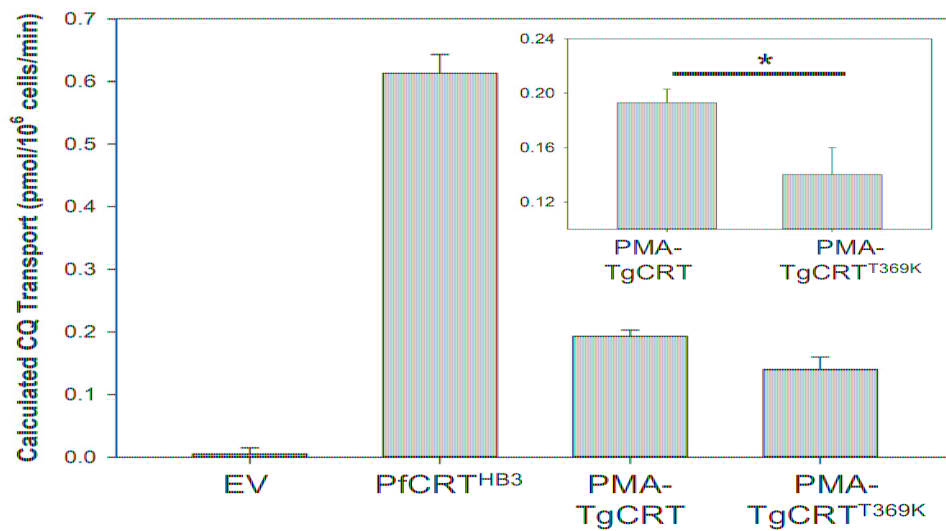

**B**

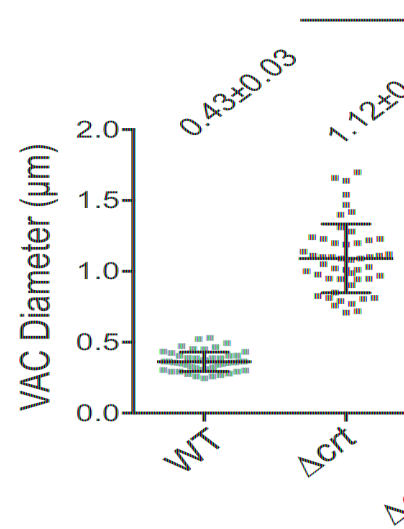

**Figure 7**



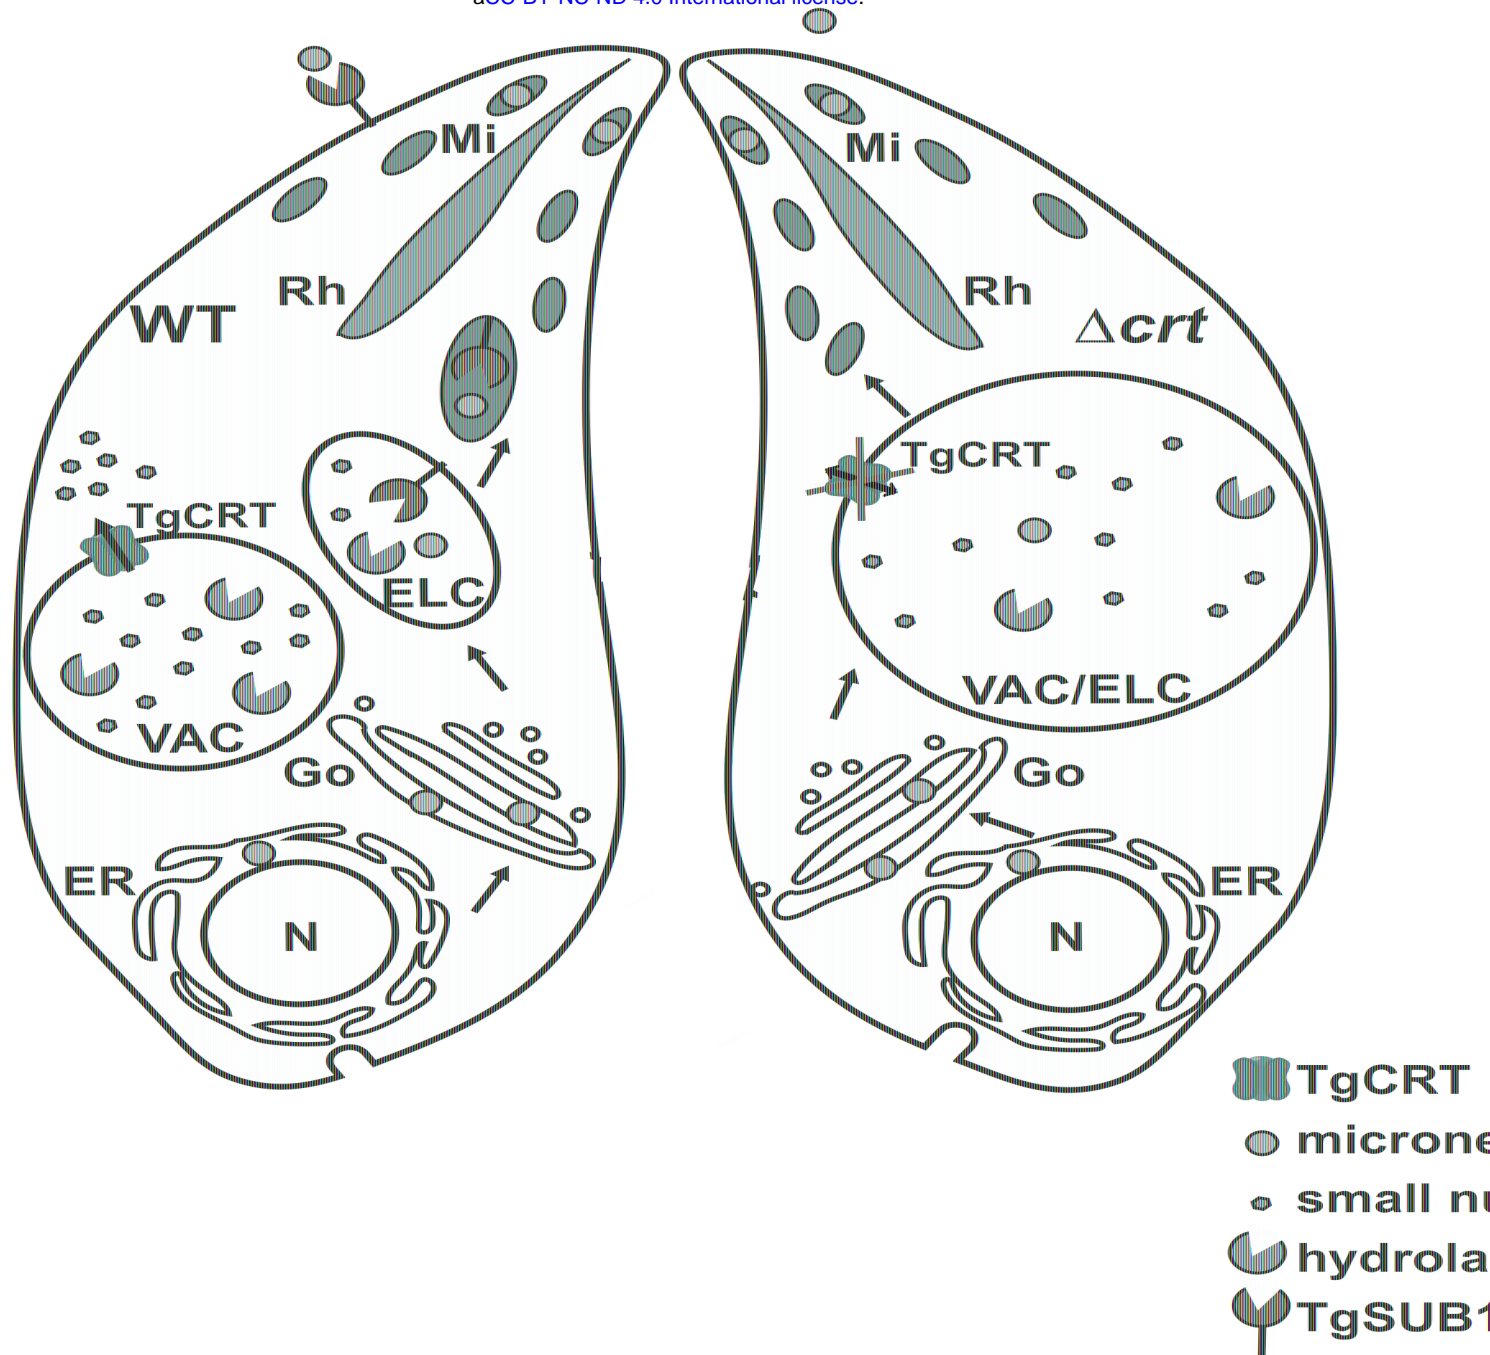

Figure 8
